# Supplementary material for: Studies of SRM NIST glasses by laser ablation multicollector inductively coupled plasma source mass spectrometry (LA-ICP-MS)
Source: Royal Society of Chemistry journal article supplement (doi:10.1039/c2ja10295a), 2012-01-01
Supplement: c2ja10295a.pdf [file c2ja10295a.pdf]

| spot size, um | Laser energy -% | Fluence(J/cm2) | Sample energy (mJ) |
|---------------|-----------------|----------------|--------------------|
| 40            | 40              | 0.07           | 0.001              |
| 40            | 40              | 0.09           | 0.001              |
| 40            | 40              | 0.1            | 0.001              |
| 40            | 50              | 0.31           | 0.004              |
| 40            | 50              | 0.33           | 0.004              |
| 40            | 50              | 0.31           | 0.006              |
| 40            | 60              | 4.28           | 0.054              |
| 40            | 60              | 4.45           | 0.056              |
| 40            | 60              | 4.51           | 0.057              |
| 40            | 70              | 9.22           | 0.116              |
| 40            | 70              | 8.29           | 0.122              |
| 40            | 70              | 8.58           | 0.108              |
| 40            | 80              | 13.55          | 0.17               |
| 40            | 80              | 13.87          | 0.174              |
| 40            | 80              | 13.98          | 0.176              |
| 40            | 90              | 17.69          | 0.222              |
| 40            | 90              | 18.1           | 0.227              |
| 40            | 90              | 17.21          | 0.216              |
| 40            | 100             | 17.98          | 0.226              |
| 40            | 100             | 19.1           | 0.241              |
| 40            | 100             | 18.74          | 0.235              |
| 55            | 40              | 0.08           | 0.002              |
| 55            | 40              | 0.09           | 0.002              |
| 55            | 40              | 0.07           | 0.002              |
| 55            | 50              | 0.19           | 0.005              |
| 55            | 50              | 0.15           | 0.003              |
| 55            | 50              | 0.17           | 0.004              |
| 55            | 60              | 3.62           | 0.086              |
| 55            | 60              | 3.49           | 0.083              |
| 55            | 60              | 3.24           | 0.077              |
| 55            | 70              | 8.47           | 0.201              |
| 55            | 70              | 7.74           | 0.184              |
| 55            | 70              | 8.66           | 0.206              |
| 55            | 80              | 12.43          | 0.295              |
| 55            | 80              | 12.71          | 0.302              |
| 55            | 80              | 12.2           | 0.29               |
| 55            | 90              | 16.85          | 0.4                |
| 55            | 90              | 16.6           | 0.394              |
| 55            | 90              | 16.7           | 0.397              |
| 55            | 100             | 17.62          | 0.419              |
| 55            | 100             | 17.92          | 0.433              |
| 55            | 100             | 17.35          | 0.412              |
| 60            | 40              | 0.13           | 0.004              |
| 60            | 40              | 0.11           | 0.003              |
| 60            | 40              | 0.13           | 0.004              |
| 60            | 50              | 0.35           | 0.01               |
| 60            | 50              | 0.32           | 0.009              |
| 60            | 50              | 0.28           | 0.008              |

|     |     |       |       |
|-----|-----|-------|-------|
| 60  | 60  | 5.41  | 0.153 |
| 60  | 60  | 5.5   | 0.156 |
| 60  | 60  | 5.37  | 0.152 |
| 60  | 70  | 11.39 | 0.322 |
| 60  | 70  | 11.69 | 0.331 |
| 60  | 70  | 11.55 | 0.327 |
| 60  | 80  | 19.38 | 0.548 |
| 60  | 80  | 18.58 | 0.525 |
| 60  | 80  | 18.75 | 0.53  |
| 60  | 90  | 23.29 | 0.659 |
| 60  | 90  | 24.88 | 0.704 |
| 60  | 90  | 23.15 | 0.655 |
| 60  | 100 | 23.62 | 0.726 |
| 60  | 100 | 25.53 | 0.722 |
| 60  | 100 | 25.73 | 0.728 |
| 80  | 40  | 0.07  | 0.004 |
| 80  | 40  | 0.08  | 0.004 |
| 80  | 40  | 0.09  | 0.005 |
| 80  | 50  | 0.19  | 0.009 |
| 80  | 50  | 0.2   | 0.01  |
| 80  | 50  | 0.18  | 0.009 |
| 80  | 60  | 4.08  | 0.205 |
| 80  | 60  | 3.86  | 0.194 |
| 80  | 60  | 3.64  | 0.183 |
| 80  | 70  | 8.1   | 0.407 |
| 80  | 70  | 8.26  | 0.415 |
| 80  | 70  | 8.02  | 0.403 |
| 80  | 80  | 11.95 | 0.601 |
| 80  | 80  | 12.93 | 0.65  |
| 80  | 80  | 12.51 | 0.629 |
| 80  | 90  | 15.82 | 0.795 |
| 80  | 90  | 16.12 | 0.81  |
| 80  | 90  | 15.73 | 0.791 |
| 80  | 100 | 17.53 | 0.881 |
| 80  | 100 | 17.13 | 0.861 |
| 80  | 100 | 17.2  | 0.864 |
| 100 | 40  | 0.08  | 0.006 |
| 100 | 40  | 0.07  | 0.005 |
| 100 | 40  | 0.09  | 0.007 |
| 100 | 50  | 0.17  | 0.014 |
| 100 | 50  | 0.2   | 0.016 |
| 100 | 50  | 0.22  | 0.018 |
| 100 | 60  | 3.47  | 0.273 |
| 100 | 60  | 3.65  | 0.287 |
| 100 | 60  | 3.18  | 0.25  |
| 100 | 70  | 7.66  | 0.602 |
| 100 | 70  | 7.44  | 0.584 |
| 100 | 70  | 7.69  | 0.604 |
| 100 | 80  | 11.3  | 0.943 |
| 100 | 80  | 11.78 | 0.925 |

|     |     |       |       |
|-----|-----|-------|-------|
| 100 | 80  | 11.95 | 0.939 |
| 100 | 90  | 14.73 | 1.17  |
| 100 | 90  | 14.29 | 1.12  |
| 100 | 90  | 14.64 | 1.15  |
| 100 | 100 | 16.33 | 1.28  |
| 100 | 100 | 16.07 | 1.26  |
| 100 | 100 | 15.15 | 1.27  |
