# Supplementary material for: Studies of SRM NIST glasses by laser ablation multicollector inductively coupled plasma source mass spectrometry (LA-ICP-MS)
Source: Royal Society of Chemistry journal article supplement (doi:10.1039/c2ja10295a), 2012-01-01
Supplement: c2ja10295a_3.pdf [file c2ja10295a_3.pdf]

|                   |     |    |         |
|-------------------|-----|----|---------|
| NIST612           | 612 | 60 | 40 IC   |
| NIST612           | 612 | 60 | 40 IC   |
| NIST612           | 612 | 60 | 40 IC   |
| NIST612           | 612 | 60 | 40 IC   |
| NIST612           | 612 | 60 | 40 IC   |
| NIST612           | 612 | 55 | 41 IC   |
| NIST612           | 612 | 55 | 41 IC   |
| NIST612           | 612 | 55 | 41 IC   |
| NIST612           | 612 | 55 | 41 IC   |
| NIST612           | 612 | 55 | 41 IC   |
| NIST612           | 610 | 60 | 34.4 IC |
| 610-10-60-34.40   | 610 | 60 | 34.4 IC |
| 610-10-60-34.4-28 | 610 | 60 | 34.4 IC |
| 610-10-60-34.4-27 | 610 | 60 | 34.4 IC |
| 610-10-60-34.4-26 | 610 | 60 | 34.4 IC |
| 610-10-60-34.4-25 | 610 | 60 | 34.4 IC |
| 610-10-60-34.4-24 | 610 | 60 | 34.4 IC |
| 610-10-60-34.4-23 | 610 | 60 | 34.4 IC |
| 610-10-60-34.4-22 | 610 | 60 | 34.4 IC |
| 610-10-55-36-13   | 610 | 66 | 36 IC   |
| 610-10-55-36-11   | 610 | 66 | 36 IC   |
| 610-10-55-36-12   | 610 | 66 | 36 IC   |
| 610-10-55-36-10   | 610 | 66 | 36 IC   |
| 610-10-55-36-09   | 610 | 66 | 36 IC   |
| 610-10-55-36-08   | 610 | 66 | 36 IC   |
| 610-10-55-36-06   | 610 | 66 | 36 IC   |
| 610-10-55-36-05   | 610 | 66 | 36 IC   |
| 610-10-55-36-03   | 610 | 66 | 36 IC   |
| 610-10-55-36-01   | 610 | 66 | 36 IC   |
| 612-20-10-64-35-c | 612 | 10 | 64 IC   |
| 612-20-10-64-34-c | 612 | 10 | 64 IC   |
| 612-20-10-64-33-c | 612 | 10 | 64 IC   |
| 612-20-10-64-29-c | 612 | 10 | 64 IC   |
| 612-20-10-64-28-c | 612 | 10 | 64 IC   |
| 612-20-10-57-17-c | 612 | 10 | 57 IC   |
| 612-20-10-57-13-c | 612 | 10 | 57 IC   |
| 612-20-10-57-14-c | 612 | 10 | 57 IC   |
| 612-20-10-57-15-c | 612 | 10 | 57 IC   |
| 612-20-10-57-16-c | 612 | 10 | 57 IC   |
| 612-20-10-53-1-c  | 612 | 10 | 53 IC   |
| 612-20-10-53-2-c  | 612 | 10 | 53 IC   |
| 612-20-10-53-3-c  | 612 | 10 | 53 IC   |
| 612-20-10-53-4-c  | 612 | 10 | 53 IC   |
| 612-20-10-53-5-c  | 612 | 10 | 53 IC   |
| 612-20-10-53-6-c  | 612 | 10 | 53 IC   |
| 612-20-10-53-7-c  | 612 | 10 | 53 IC   |
| 612-20-10-53-7-c  | 612 | 10 | 53 IC   |
| 612-20-10-53-8-c  | 612 | 10 | 53 IC   |
| 612-20-10-53-9-c  | 612 | 10 | 53 IC   |
| 612-20-10-53-10-c | 612 | 10 | 53 IC   |

|                     |     |    |       |
|---------------------|-----|----|-------|
| 612-20-10-57-11-c   | 612 | 10 | 57 IC |
| 612-20-10-57-12-c   | 612 | 10 | 57 IC |
| 612-10-55-38.7-22-c | 612 | 55 | 39 IC |
| 612-10-55-38.7-23-c | 612 | 55 | 39 IC |
| 612-10-55-38.7-24-c | 612 | 55 | 39 IC |
| 612-10-55-38.7-25-c | 612 | 55 | 39 IC |
| 612-10-55-38.7-26-c | 612 | 55 | 39 IC |
| 614-10-55-75-16-d   | 614 | 55 | 75 IC |
| 614-10-55-75-15-d   | 614 | 55 | 75 IC |
| 614-10-55-75-14-d   | 614 | 55 | 75 IC |
| 614-10-55-75-13-d   | 614 | 55 | 75 IC |
| 614-10-55-75-12-d   | 614 | 55 | 75 IC |
| 614-10-55-75-11-d   | 614 | 55 | 75 IC |
| 614-10-55-75-10-d   | 614 | 55 | 75 IC |
| 614-10-55-75-9-d    | 614 | 55 | 75 IC |
| 614-10-55-65-8-d    | 614 | 55 | 65 IC |
| 614-10-55-65-7-d    | 614 | 55 | 65 IC |
| 614-10-55-65-6-d    | 614 | 55 | 65 IC |
| 614-10-55-65-6-d    | 614 | 55 | 65 IC |
| 614-10-55-65-5-d    | 614 | 55 | 65 IC |
| 614-10-55-65-4-d    | 614 | 55 | 65 IC |
| 614-10-55-65-3-d    | 614 | 55 | 65 IC |
| 614-10-55-65-2-d    | 614 | 55 | 65 IC |
| 614-10-55-65-1-d    | 614 | 55 | 65 IC |
| 614-4-10-55-75-38-d | 614 | 55 | 75 IC |
| 614-4-10-55-75-38-d | 614 | 55 | 75 IC |
| 614-4-10-55-75-37-d | 614 | 55 | 75 IC |
| 614-3-10-55-75-36-d | 614 | 55 | 75 IC |
| 614-3-10-55-75-35-d | 614 | 55 | 75 IC |
| 614-3-10-55-75-24-d | 614 | 55 | 75 IC |
| 614-10-55-75-16-d   | 614 | 55 | 75 IC |
| 614-10-55-75-70-d   | 614 | 55 | 75 IC |
| 614-10-55-75-69-d   | 614 | 55 | 75 IC |
| 614-10-55-75-68-d   | 614 | 55 | 75 IC |
| 614-10-55-75-67-d   | 614 | 55 | 75 IC |
| 614-10-55-75-66-d   | 614 | 55 | 75 IC |
| 614-10-55-75-60-d   | 614 | 55 | 75 IC |
| 614-10-55-75-60-d   | 614 | 55 | 75 IC |
| 614-10-55-75-59-d   | 614 | 55 | 75 IC |
| 614-10-55-75-58-d   | 614 | 55 | 75 IC |
| 614-10-55-75-57-d   | 614 | 55 | 75 IC |
| 614-10-55-75-56-d   | 614 | 55 | 75 IC |
| 614-10-55-75-50-d   | 614 | 55 | 75 IC |
| 614-10-55-75-49-d   | 614 | 55 | 75 IC |
| 614-10-55-75-48-d   | 614 | 55 | 75 IC |
| 614-10-55-75-47-d   | 614 | 55 | 75 IC |
| 614-10-55-75-46-d   | 614 | 55 | 75 IC |
| 614-4-10-55-75-39-d | 614 | 55 | 75 IC |
| 614-10-56-75-83-d   | 614 | 55 | 75 IC |
| 614-10-56-75-84-d   | 614 | 55 | 75 IC |

|                   |     |    |       |
|-------------------|-----|----|-------|
| 614-10-56-75-85-d | 614 | 55 | 75 IC |
| 614-10-56-75-86-d | 614 | 55 | 75 IC |
| 614-10-55-75-50-d | 614 | 55 | 75 IC |
| 614-10-55-75-51-d | 614 | 55 | 75 IC |
| 614-10-55-75-54-d | 614 | 55 | 75 IC |
| 614-10-55-75-59-d | 614 | 55 | 75 IC |
| 614-10-55-75-60-d | 614 | 55 | 75 IC |
| 614-10-55-75-62-d | 614 | 55 | 75 IC |
| 614-10-55-75-63-d | 614 | 55 | 75 IC |
| 614-10-56-75-69-d | 614 | 55 | 75 IC |
| 614-10-56-75-70-d | 614 | 55 | 75 IC |
| 614-10-56-75-71-d | 614 | 55 | 75 IC |
| 614-10-56-75-72-d | 614 | 55 | 75 IC |
| 614-10-56-75-74-d | 614 | 55 | 75 IC |
| 614-10-56-75-73-d | 614 | 55 | 75 IC |
| 614-10-56-75-74-d | 614 | 55 | 75 IC |
| 614-10-56-75-76-d | 614 | 55 | 75 IC |
| 614-10-55-75-48-d | 614 | 55 | 75 IC |
| 614-10-55-75-49-d | 614 | 55 | 75 IC |
| 614-10-55-75-50-d | 614 | 55 | 75 IC |
| 614-10-55-75-50-d | 614 | 55 | 75 IC |
| 614-10-55-75-51-d | 614 | 55 | 75 IC |
| 614-10-55-75-54-d | 614 | 55 | 75 IC |
| 614-10-55-75-59-d | 614 | 55 | 75 IC |
| 614-10-55-75-60-d | 614 | 55 | 75 IC |
| 614-10-55-75-62-d | 614 | 55 | 75 IC |
| 614-10-55-75-63-d | 614 | 55 | 75 IC |
| 614-10-56-75-69-d | 614 | 55 | 75 IC |
| 614-10-56-75-70-d | 614 | 55 | 75 IC |
| 614-10-56-75-71-d | 614 | 55 | 75 IC |
| 614-10-56-75-72-d | 614 | 55 | 75 IC |
| 614-10-56-75-74-d | 614 | 55 | 75 IC |
| 614-10-56-75-73-d | 614 | 55 | 75 IC |
| 614-10-56-75-74-d | 614 | 55 | 75 IC |
| 614-10-56-75-76-d | 614 | 55 | 75 IC |
| 614-10            | 614 | 55 | 75 IC |
| 614-10-55-75-30-d | 614 | 55 | 75 IC |
| 614-10-55-75-31-d | 614 | 55 | 75 IC |
| 614-10-55-75-32-d | 614 | 55 | 75 IC |
| 614-10-55-75-33-d | 614 | 55 | 75 IC |
| 614-10-55-75-33-d | 614 | 55 | 75 IC |
| 614-10-55-75-34-d | 614 | 55 | 75 IC |
| 614-10-55-75-35-d | 614 | 55 | 75 IC |
| 614-10-55-75-42-d | 614 | 55 | 75 IC |
| 614-10-55-75-43-d | 614 | 55 | 75 IC |
| 614-10-55-75-44-d | 614 | 55 | 75 IC |
| 614-10-55-75-45-d | 614 | 55 | 75 IC |
| 614-10-55-75-46-d | 614 | 55 | 75 IC |
| 614-10-55-75-1-d  | 614 | 55 | 75 IC |
| 614-10-55-75-3-d  | 614 | 55 | 75 IC |

|                        |     |    |       |
|------------------------|-----|----|-------|
| 614-10-55-75-2-d       | 614 | 55 | 75 IC |
| 614-10-55-75-4-d       | 614 | 55 | 75 IC |
| 614-10-55-75-5-d       | 614 | 55 | 75 IC |
| 614-10-55-75-11-d      | 614 | 55 | 75 IC |
| 614-10-55-75-12-d      | 614 | 55 | 75 IC |
| 614-10-55-75-13-d      | 614 | 55 | 75 IC |
| 614-10-55-75-14-d      | 614 | 55 | 75 IC |
| 614-10-55-75-15-d      | 614 | 55 | 75 IC |
| 614-10-55-75-21-d      | 614 | 55 | 75 IC |
| 614-10-55-74-22-d      | 614 | 55 | 75 IC |
| 614-10-55-75-23-d      | 614 | 55 | 75 IC |
| 614-10-55-75-24-d      | 614 | 55 | 75 IC |
| 614-10-55-75-25-d      | 614 | 55 | 75 IC |
| 614-10-55-75-26-d      | 614 | 55 | 75 IC |
| 614-10-55-75-27-d      | 614 | 55 | 75 IC |
| NIST614-10-60-80-g-003 | 614 | 60 | 80 F  |
| NIST614-10-60-80-g-003 | 614 | 60 | 80 F  |
| NIST614-10-60-80-g-002 | 614 | 60 | 80 F  |
| NIST614-10-60-80-g-002 | 614 | 60 | 80 F  |
| NIST614-10-60-80-g-001 | 614 | 60 | 80 F  |
| NIST614-10-60-80-g-001 | 614 | 60 | 80 F  |
| NIST614-10-60-80-g-004 | 614 | 60 | 80 F  |
| NIST614-10-60-80-g-004 | 614 | 60 | 80 F  |
| NIST614-10-60-80-g-005 | 614 | 60 | 80 F  |
| NIST614-10-60-80-g-005 | 614 | 60 | 80 F  |
| NIST614-10-60-80-g-005 | 614 | 60 | 80 F  |
| NIST614-10-60-80-g-005 | 614 | 60 | 80 F  |
| NIST614-10-60-80-g-005 | 614 | 60 | 80 F  |
| NIST614-10-60-80-g-006 | 614 | 60 | 80 F  |
| NIST614-10-60-80-g-006 | 614 | 60 | 80 F  |
| NIST614-10-60-80-g-007 | 614 | 60 | 80 F  |
| NIST614-10-60-80-g-007 | 614 | 60 | 80 F  |
| NIST614-10-60-80-g-008 | 614 | 60 | 80 F  |
| NIST614-10-60-80-g-008 | 614 | 60 | 80 F  |
| NIST614-10-60-80-g-009 | 614 | 60 | 80 F  |
| NIST614-10-60-80-g-009 | 614 | 60 | 80 F  |
| NIST614-10-60-80-g-009 | 614 | 60 | 80 F  |
| NIST614-10-60-80-g-009 | 614 | 60 | 80 F  |
| NIST614-10-80-80-g-021 | 614 | 80 | 80 F  |
| NIST614-10-80-80-g-021 | 614 | 80 | 80 F  |
| NIST614-10-80-80-g-022 | 614 | 80 | 80 F  |
| NIST614-10-80-80-g-022 | 614 | 80 | 80 F  |
| NIST614-10-80-80-g-023 | 614 | 80 | 80 F  |
| NIST614-10-80-80-g-023 | 614 | 80 | 80 F  |
| NIST614-10-80-80-g-024 | 614 | 80 | 80 F  |
| NIST614-10-80-80-g-024 | 614 | 80 | 80 F  |
| NIST614-10-80-80-g-025 | 614 | 80 | 80 F  |
| NIST614-10-80-80-g-025 | 614 | 80 | 80 F  |
| NIST614-10-80-80-g-033 | 614 | 80 | 80 F  |
| NIST614-10-80-80-g-033 | 614 | 80 | 80 F  |
| NIST614-10-80-90-g-034 | 614 | 80 | 90 F  |

|                              |     |     |       |
|------------------------------|-----|-----|-------|
| NIST614-10-80-90-g-034       | 614 | 80  | 90 F  |
| NIST614-10-80-90-g-035       | 614 | 80  | 90 F  |
| NIST614-10-80-90-g-035       | 614 | 80  | 90 F  |
| NIST614-10-80-90-g-036       | 614 | 80  | 90 F  |
| NIST614-10-80-90-g-036       | 614 | 80  | 90 F  |
| NIST614-10-80-100-g-045      | 614 | 80  | 100 F |
| NIST614-10-80-100-g-045      | 614 | 80  | 100 F |
| NIST614-10-80-100-g-046      | 614 | 80  | 100 F |
| NIST614-10-80-100-g-046      | 614 | 80  | 100 F |
| NIST614-10-80-100-g-047      | 614 | 80  | 100 F |
| NIST614-10-80-100-g-047      | 614 | 80  | 100 F |
| NIST614-10-80-100-g-047      | 614 | 80  | 100 F |
| NIST614-10-80-100-g-047      | 614 | 80  | 100 F |
| NIST614-10-80-100-g-048      | 614 | 80  | 100 F |
| NIST614-10-80-100-g-048      | 614 | 80  | 100 F |
| NIST614-10-80-100-g-049      | 614 | 80  | 100 F |
| NIST614-10-80-100-g-049      | 614 | 80  | 100 F |
| NIST614-10-80-100-g-050      | 614 | 80  | 100 F |
| NIST612-10-80-40-01          | 612 | 80  | 40 F  |
| NIST612-10-80-40-01          | 612 | 80  | 40 F  |
| NIST612-10-80-40-02          | 612 | 80  | 40 F  |
| NIST612-10-80-40-02          | 612 | 80  | 40 F  |
| NIST612-10-80-40-03          | 612 | 80  | 40 F  |
| NIST612-10-80-40-03          | 612 | 80  | 40 F  |
| NIST612-10-80-45-04          | 612 | 80  | 45 F  |
| NIST612-10-80-45-04          | 612 | 80  | 45 F  |
| NIST614-10-80-100-h-001      | 612 | 80  | 100 F |
| NIST614-10-80-100-h-001      | 612 | 80  | 100 F |
| NIST612-10-80-40-001-i       | 612 | 80  | 40 F  |
| NIST612-10-80-40-001-i       | 612 | 80  | 40 F  |
| NIST612-10-80-40-003-i       | 612 | 80  | 40 F  |
| NIST612-10-80-40-003-i       | 612 | 80  | 40 F  |
| NIST612-10-80-40-002-i       | 612 | 80  | 40 F  |
| NIST612-10-80-40-004-i       | 612 | 80  | 40 F  |
| NIST612-10-80-40-004-i       | 612 | 80  | 40 F  |
| NIST614-20-100-95-spot-001-m | 614 | 100 | 95 F  |
| NIST614-20-100-95-spot-001-m | 614 | 100 | 95 F  |
| NIST614-20-100-95-spot-002-m | 614 | 100 | 95 F  |
| NIST614-20-100-95-spot-002-m | 614 | 100 | 95 F  |
| NIST614-20-100-95-spot-003-m | 614 | 100 | 95 F  |
| NIST614-20-100-95-spot-003-m | 614 | 100 | 95 F  |
| NIST614-20-100-95-spot-028-m | 614 | 100 | 95 F  |
| NIST614-20-100-95-spot-028-m | 614 | 100 | 95 F  |
| NIST614-20-100-95-spot-029-m | 614 | 100 | 95 F  |
| NIST614-20-100-95-spot-029-m | 614 | 100 | 95 F  |
| NIST614-20-100-95-spot-62-m  | 614 | 100 | 95 F  |
| NIST614-20-100-95-spot-62-m  | 614 | 100 | 95 F  |
| NIST614-20-100-95-spot-63-m  | 614 | 100 | 95 F  |
| NIST614-20-100-95-spot-63-m  | 614 | 100 | 95 F  |
| NIST614-20-100-95-spot-64-m  | 614 | 100 | 95 F  |

|                             |     |     |       |
|-----------------------------|-----|-----|-------|
| NIST614-20-100-95-spot-64-m | 614 | 100 | 95 F  |
| NIST614-20-80-95-002-n      | 614 | 80  | 95 F  |
| NIST614-20-80-95-002-n      | 614 | 80  | 95 F  |
| NIST614-20-80-95-002-n      | 614 | 80  | 95 F  |
| NIST614-20-80-95-002-n      | 614 | 80  | 95 F  |
| NIST614-20-80-95-002-n      | 614 | 80  | 95 F  |
| NIST614-20-80-95-002-n      | 614 | 80  | 95 F  |
| NIST614-20-100-95-001-n     | 614 | 80  | 95 F  |
| NIST614-20-100-95-001-n     | 614 | 100 | 95 F  |
| NIST614-20-100-95-001-n     | 614 | 100 | 95 F  |
| NIST614-20-100-95-001-n     | 614 | 100 | 95 F  |
| Nist614-20-80-95-23         | 614 | 80  | 95 F  |
| Nist614-20-80-95-23         | 614 | 80  | 95 F  |
| Nist614-20-80-95-22         | 614 | 80  | 95 F  |
| Nist614-20-80-95-22         | 614 | 80  | 95 F  |
| Nist614-20-80-95-20         | 614 | 80  | 95 F  |
| Nist614-20-80-95-20         | 614 | 80  | 95 F  |
| Nist614-20-80-95-21         | 614 | 80  | 95 F  |
| Nist614-20-80-95-21         | 614 | 80  | 95 F  |
| Nist614-20-80-95-21         | 614 | 80  | 95 F  |
| Nist614-20-80-95-21         | 614 | 80  | 95 F  |
| NIST614-20-80-95-005-n      | 614 | 80  | 95 F  |
| NIST614-20-80-95-005-n      | 614 | 80  | 95 F  |
| NIST614-20-80-95-004-n      | 614 | 80  | 95 F  |
| NIST614-20-80-95-004-n      | 614 | 80  | 95 F  |
| NIST614-20-80-95-003-n      | 614 | 80  | 95 F  |
| NIST614-20-80-95-003-n      | 614 | 80  | 95 F  |
| NIST612-10-55-40-043-p      | 612 | 55  | 40 IC |
| NIST612-10-55-40-043-p      | 612 | 55  | 40 IC |
| NIST612-20-12-50-021-p      | 612 | 12  | 50 IC |
| NIST612-10-55-40-058-p      | 612 | 55  | 40 IC |
| NIST612-10-55-40-058-p      | 612 | 55  | 40 IC |
| NIST612-10-55-40-060-p      | 612 | 55  | 40 IC |
| NIST612-10-55-40-059-p      | 612 | 55  | 40 IC |
| NIST612-10-55-40-040-p      | 612 | 55  | 40 IC |
| NIST612-10-55-40-038-p      | 612 | 55  | 40 IC |
| NIST612-10-55-40-039-p      | 612 | 55  | 40 IC |
| NIST612-10-55-40-060-p      | 612 | 55  | 40 IC |
| NIST612-20-12-50-032-p      | 612 | 12  | 50 IC |
| NIST612-20-12-50-033-p      | 612 | 12  | 50 IC |
| NIST612-20-12-50-034-p      | 612 | 12  | 50 IC |
| NIST612-20-12-50-035-p      | 612 | 12  | 50 IC |
| NIST612-20-12-50-061-p      | 612 | 12  | 50 IC |
| NIST612-20-12-50-062-p      | 612 | 12  | 50 IC |
| NIST612-20-12-50-062-p      | 612 | 12  | 50 IC |
| NIST612-20-12-50-063-p      | 612 | 12  | 50 IC |
| NIST612-20-12-50-064-p      | 612 | 12  | 50 IC |
| NIST612-20-12-50-065-p      | 612 | 12  | 50 IC |
| NIST612-20-12-50-16-q       | 612 | 12  | 50 IC |
| NIST612-20-12-50-15-q       | 612 | 12  | 50 IC |

|                        |     |    |       |
|------------------------|-----|----|-------|
| NIST612-20-12-50-14-q  | 612 | 12 | 50 IC |
| NIST612-20-12-50-13-q  | 612 | 12 | 50 IC |
| NIST612-20-12-50-12-q  | 612 | 12 | 50 IC |
| NIST612-20-12-50-11-q  | 612 | 12 | 50 IC |
| NIST612-20-12-50-10-q  | 612 | 12 | 50 IC |
| NIST612-20-12-50-9-q   | 612 | 12 | 50 IC |
| NIST612-20-12-50-19-q  | 612 | 12 | 50 IC |
| NIST612-20-12-50-20-q  | 612 | 12 | 50 IC |
| NIST612-20-12-50-21-q  | 612 | 12 | 50 IC |
| NIST612-20-12-50-22-q  | 612 | 12 | 50 IC |
| NIST612-20-12-50-23-q  | 612 | 12 | 50 IC |
| NIST612-20-12-50-24-q  | 612 | 12 | 50 IC |
| NIST612-20-12-50-29-q  | 612 | 12 | 50 IC |
| NIST612-20-12-50-8-q   | 612 | 12 | 50 IC |
| NIST612-20-12-50-7-q   | 612 | 12 | 50 IC |
| NIST612-20-12-50-6-q   | 612 | 12 | 50 IC |
| NIST612-20-12-50-5-q   | 612 | 12 | 50 IC |
| NIST612-20-12-50-4-q   | 612 | 12 | 50 IC |
| NIST612-20-12-50-3-q   | 612 | 12 | 50 IC |
| NIST614-10-60-47-33-q  | 614 | 60 | 47 IC |
| NIST614-10-60-47-33-q  | 614 | 60 | 47 IC |
| NIST614-10-60-47-34-q  | 614 | 60 | 47 IC |
| NIST614-10-60-47-35-q  | 614 | 60 | 47 IC |
| NIST614-10-60-47-36-q  | 614 | 60 | 47 IC |
| NIST614-10-60-47-56-q  | 614 | 60 | 47 IC |
| NIST614-10-60-47-57-q  | 614 | 60 | 47 IC |
| NIST614-10-60-47-58-q  | 614 | 60 | 47 IC |
| NIST614-10-60-47-59-q  | 614 | 60 | 47 IC |
| NIST614-10-60-47-60-q  | 614 | 60 | 47 IC |
| NIST614-20-25-57-61-q  | 614 | 25 | 57 IC |
| NIST614-20-25-57-62-q  | 614 | 25 | 57 IC |
| NIST614-20-25-57-63-q  | 614 | 25 | 57 IC |
| NIST614-20-25-57-64-q  | 614 | 25 | 57 IC |
| NIST614-20-25-57-65-q  | 614 | 25 | 57 IC |
| NIST614-20-25-57-71-q  | 614 | 25 | 57 IC |
| NIST614-20-25-57-72-q  | 614 | 25 | 57 IC |
| NIST614-20-25-57-73-q  | 614 | 25 | 57 IC |
| NIST614_5_55_65_015_q  | 614 | 55 | 65 IC |
| NIST614_5_55_65_017_q  | 614 | 55 | 65 IC |
| NIST614_5_55_65_018_q  | 614 | 55 | 65 IC |
| NIST614_10_55_65_001_q | 614 | 55 | 65 IC |
| NIST614_10_55_65_002_q | 614 | 55 | 65 IC |
| NIST614_10_55_65_003_q | 614 | 55 | 65 IC |
| NIST614_10_55_65_004_q | 614 | 55 | 65 IC |
| NIST614_10_55_65_005_q | 614 | 55 | 65 IC |
| NIST614_10_55_65_006_q | 614 | 55 | 65 IC |
| NIST614_5_55_65_015_q  | 614 | 55 | 65 IC |
| NIST614_5_55_65_017_q  | 614 | 55 | 65 IC |
| NIST614_5_55_65_018_q  | 614 | 55 | 65 IC |
| NIST614_10_55_65_024_q | 614 | 55 | 65 IC |

|                        |     |    |       |
|------------------------|-----|----|-------|
| NIST614_10_55_65_025_q | 614 | 55 | 65 IC |
| NIST614_10_55_65_026_q | 614 | 55 | 65 IC |
| NIST614_10_55_65_027_q | 614 | 55 | 65 IC |
| NIST614_10_55_65_029_q | 614 | 55 | 65 IC |
| NIST614_10_55_65_028_q | 614 | 55 | 65 IC |
| NIST614_10_80_45_032_q | 614 | 80 | 45 IC |
| NIST614_10_80_45_033_q | 614 | 80 | 45 IC |
| NIST614_10_80_45_034_q | 614 | 80 | 45 IC |
| NIST614_10_80_45_035_q | 614 | 80 | 45 IC |
| NIST614_10_80_45_036_q | 614 | 80 | 45 IC |
| NIST614_10_80_45_037_q | 614 | 80 | 45 IC |
| NIST614_10_60_45_041_q | 614 | 60 | 45 IC |
| NIST614_10_60_45_042_q | 614 | 60 | 45 IC |
| NIST614_10_60_45_043_q | 614 | 60 | 45 IC |
| NIST614_10_60_45_044_q | 614 | 60 | 45 IC |
| NIST614_10_55_45_045_q | 614 | 55 | 45 IC |
| NIST614_10_55_45_046_q | 614 | 55 | 45 IC |
| NIST614_10_55_45_047_q | 614 | 55 | 45 IC |
| NIST614_10_55_45_048_q | 614 | 55 | 45 IC |
| NIST614_10_55_45_049_q | 614 | 55 | 45 IC |
| NIST614_10_40_45_050_q | 614 | 55 | 45 IC |
| NIST614_10_40_45_051_q | 614 | 55 | 45 IC |
| NIST614_10_55_65_054_q | 614 | 55 | 65 IC |
| NIST614_10_55_65_055_q | 614 | 55 | 65 IC |
| NIST614_10_55_65_056_q | 614 | 55 | 65 IC |
| NIST614_10_55_65_057_q | 614 | 55 | 65 IC |
| NIST614_10_60_65_058_q | 614 | 60 | 65 IC |
| NIST614_10_60_65_059_q | 614 | 60 | 65 IC |
| NIST614_10_60_65_060_q | 614 | 60 | 65 IC |
| NIST614_10_60_65_061_q | 614 | 60 | 65 IC |
| NIST614_10_60_65_062_q | 614 | 60 | 65 IC |
| NIST614_10_55_65_064_q | 614 | 55 | 65 IC |
| NIST614_5_55_65_015_q  | 614 | 55 | 65 IC |
| NIST614_5_55_65_017_q  | 614 | 55 | 65 IC |
| NIST614_5_55_65_018_q  | 614 | 55 | 65 IC |
| NIST614_10_55_65_001_q | 614 | 55 | 65 IC |
| NIST614_10_55_65_002_q | 614 | 55 | 65 IC |
| NIST614_10_55_65_003_q | 614 | 55 | 65 IC |
| NIST614_10_55_65_004_q | 614 | 55 | 65 IC |
| NIST614_10_55_65_005_q | 614 | 55 | 65 IC |
| NIST614_10_55_65_006_q | 614 | 55 | 65 IC |
| NIST614_5_55_65_015_q  | 614 | 55 | 65 IC |
| NIST614_5_55_65_012_r  | 614 | 55 | 65 IC |
| NIST614_5_55_65_014_r  | 614 | 55 | 65 IC |
| NIST614_5_55_65_014_r  | 614 | 55 | 65 IC |
| NIST614_5_55_65_016_r  | 614 | 55 | 65 IC |
| NIST614_5_55_65_015_r  | 614 | 55 | 65 IC |
| NIST614_5_55_65_017_r  | 614 | 55 | 65 IC |
| NIST614_10_55_65_001_r | 614 | 55 | 65 IC |
| NIST614_10_55_65_002_r | 614 | 55 | 65 IC |

|                        |     |    |       |
|------------------------|-----|----|-------|
| NIST614_10_55_65_003_r | 614 | 55 | 65 IC |
| NIST614_10_55_65_004_r | 614 | 55 | 65 IC |
| NIST614_10_55_65_005_r | 614 | 55 | 65 IC |
| NIST614_10_55_65_027_r | 614 | 55 | 65 IC |
| NIST614_5_55_65_015_r  | 614 | 55 | 65 IC |
| NIST614_5_55_65_018_r  | 614 | 55 | 65 IC |
| NIST614_5_55_65_019_r  | 614 | 55 | 65 IC |
| NIST614_5_55_65_020_r  | 614 | 55 | 65 IC |
| NIST614_5_55_65_021_r  | 614 | 55 | 65 IC |
| NIST614_10_55_65_024_r | 614 | 55 | 65 IC |
| NIST614_10_55_65_026_r | 614 | 55 | 65 IC |
| NIST614_10_55_65_028_r | 614 | 55 | 65 IC |
| NIST614_10_55_65_029_r | 614 | 55 | 65 IC |
| NIST614_10_80_65_032_r | 614 | 80 | 65 IC |
| NIST614_10_80_65_033_r | 614 | 80 | 65 IC |
| NIST614_10_80_65_034_r | 614 | 80 | 65 IC |
| NIST614_10_80_65_039_r | 614 | 80 | 65 IC |
| NIST614_10_60_65_041_r | 614 | 60 | 65 IC |
| NIST614_10_60_65_042_r | 614 | 60 | 65 IC |
| NIST614_10_60_65_043_r | 614 | 60 | 65 IC |
| NIST614_10_60_65_044_r | 614 | 60 | 65 IC |
| NIST614_10_55_65_045_r | 614 | 55 | 65 IC |
| NIST614_10_55_65_047_r | 614 | 55 | 65 IC |
| NIST614_10_55_65_048_r | 614 | 55 | 65 IC |
| NIST614_10_55_65_049_r | 614 | 55 | 65 IC |
| NIST614_10_40_65_050_r | 614 | 40 | 65 IC |
| NIST614_10_40_65_051_r | 614 | 40 | 65 IC |
| NIST614_10_40_65_052_r | 614 | 40 | 65 IC |
| NIST614_10_40_65_053_r | 614 | 40 | 65 IC |
| NIST614_10_60_65_060_r | 614 | 60 | 65 IC |
| NIST614_10_60_65_061_r | 614 | 60 | 65 IC |
| NIST614_10_60_65_062_r | 614 | 60 | 65 IC |
| NIST614_10_60_65_063_r | 614 | 60 | 65 IC |
| NIST614_10_55_65_064_r | 614 | 55 | 65 IC |
| NIST614_10_55_65_065_r | 614 | 55 | 65 IC |
| NIST614_10_55_65_066_r | 614 | 55 | 65 IC |
| NIST614_10_55_65_067_r | 614 | 55 | 65 IC |
| NIST614_10_55_65_068_r | 614 | 55 | 65 IC |
| NIST614_10_55_65_069_r | 614 | 55 | 65 IC |
| NIST614_10_55_65_070_r | 614 | 55 | 65 IC |
| NIST614_10_55_65_071_r | 614 | 55 | 65 IC |
| NIST614_10_55_65_072_r | 614 | 55 | 65 IC |
| NIST614_10_55_65_073_r | 614 | 55 | 65 IC |
| NIST614_10_55_65_074_r | 614 | 55 | 65 IC |
| NIST614_10_55_65_075_r | 614 | 55 | 65 IC |
| nist614_10_80_45_027_s | 614 | 80 | 45 IC |
| nist614_10_80_45_025_s | 614 | 80 | 45 IC |
| nist614_10_80_45_023_s | 614 | 80 | 45 IC |
| nist614_10_80_45_022_s | 614 | 80 | 45 IC |
| nist614_10_80_45_021_s | 614 | 80 | 45 IC |

|                            |     |    |       |
|----------------------------|-----|----|-------|
| NIST614_10_55_65_083_s.run | 614 | 55 | 65 IC |
| NIST614_10_55_65_082_s.run | 614 | 55 | 65 IC |
| NIST614_10_55_65_081_s.run | 614 | 55 | 65 IC |
| NIST614_10_55_65_080_s.run | 614 | 55 | 65 IC |
| NIST614_10_55_65_079_s.run | 614 | 55 | 65 IC |
| NIST614_10_55_45_055_s     | 614 | 55 | 45 IC |
| NIST614_10_55_45_054_s     | 614 | 55 | 45 IC |
| NIST614_10_55_45_053_s     | 614 | 55 | 45 IC |
| NIST614_10_55_45_052_s     | 614 | 55 | 45 IC |
| NIST614_10_55_45_051_s     | 614 | 55 | 45 IC |
| NIST614_10_55_45_050_s     | 614 | 55 | 45 IC |
| nist614_10_40_45_006_s     | 614 | 40 | 45 IC |
| nist614_10_40_45_005_s     | 614 | 40 | 45 IC |
| nist614_10_40_45_004_s     | 614 | 40 | 45 IC |
| nist614_10_40_45_003_s     | 614 | 40 | 45 IC |
| nist614_10_40_45_002_s     | 614 | 40 | 45 IC |
| nist614_10_40_45_001_s     | 614 | 40 | 45 IC |
| 610-10-55-36.7-33-b        | 610 | 55 | 37 IC |
| 610-10-55-36.7-31-b        | 610 | 55 | 37 IC |
| 610-10-55-36.7-30-b        | 610 | 55 | 37 IC |
| 610-10-55-36.7-29-b        | 610 | 55 | 37 IC |
| 610-10-55-36.7-28-b        | 610 | 55 | 37 IC |
| 610-10-55-34.5-16-b        | 610 | 55 | 35 IC |
| 610-10-55-34.5-15-b        | 610 | 55 | 35 IC |
| 610-10-55-34.5-14-b        | 610 | 55 | 35 IC |
| 610-10-55-34.5-13-b        | 610 | 55 | 35 IC |
| 610-10-55-34.5-12-b        | 610 | 55 | 35 IC |
| 610-10-55-34.5-11-b        | 610 | 55 | 35 IC |
| 610-10-55-36-09-b          | 610 | 55 | 36 IC |
| 610-10-55-36-08            | 610 | 55 | 36 IC |
| 610-10-55-36-07            | 610 | 55 | 36 IC |
| 610-10-55-36-07-b          | 610 | 55 | 36 IC |
| 610-10-55-36-07-b          | 610 | 55 | 36 IC |
| 610-10-55-36-06-b          | 610 | 55 | 36 IC |
| 610-10-55-36-05            | 610 | 55 | 36 IC |
| 610-10-55-36-04-b          | 610 | 55 | 36 IC |
| 610-10-60-34.4-22          | 610 | 60 | 34 IC |
| 610-10-60-34.4-20          | 610 | 60 | 34 IC |
| 610-10-60-34.4-17l         | 610 | 60 | 34 IC |
| 610-10-60-34.4-15          | 610 | 60 | 34 IC |
| 610-10-55-34.5-15-b        | 610 | 60 | 34 IC |
| 610-10-60-34.4-14          | 610 | 60 | 34 IC |
| 610-10-55-36-09-b          | 610 | 55 | 36 IC |
| 610-10-55-36-08            | 610 | 55 | 36 IC |
| 610-10-55-36-07            | 610 | 55 | 36 IC |
| 610-10-55-36-07-b          | 610 | 55 | 36 IC |
| 610-10-55-36-07-b          | 610 | 55 | 36 IC |
| 610-10-55-36-06-b          | 610 | 55 | 36 IC |
| 610-10-55-36-05            | 610 | 55 | 36 IC |
| 610-10-55-36-04-b          | 610 | 55 | 36 IC |

|                        |     |    |       |
|------------------------|-----|----|-------|
| 610-10-60-34.4-22      | 610 | 60 | 34 IC |
| 610-10-60-34.4-20      | 610 | 60 | 34 IC |
| 610-10-60-34.4-17l     | 610 | 60 | 34 IC |
| 610-10-60-34.4-15      | 610 | 60 | 34 IC |
| 610-10-55-34.5-15-b    | 610 | 60 | 34 IC |
| 610-10-60-34.4-14      | 610 | 60 | 34 IC |
| NIST610_10_60_80_030w  | 610 | 60 | 80 F  |
| NIST610_10_60_80_030w  | 610 | 60 | 80 F  |
| NIST610_10_60_80_030w  | 610 | 60 | 80 F  |
| NIST610_10_60_80_031w  | 610 | 60 | 80 F  |
| NIST610_10_60_80_031w  | 610 | 60 | 80 F  |
| NIST610_10_60_80_031w  | 610 | 60 | 80 F  |
| NIST610_10_60_80_032w  | 610 | 60 | 80 F  |
| NIST610_10_60_80_032w  | 610 | 60 | 80 F  |
| NIST610_10_60_80_032w  | 610 | 60 | 80 F  |
| NIST610_10_60_80_033w  | 610 | 60 | 80 F  |
| NIST610_10_60_80_033w  | 610 | 60 | 80 F  |
| NIST610_10_60_80_033w  | 610 | 60 | 80 F  |
| NIST610_10_60_80_034w  | 610 | 60 | 80 F  |
| NIST610_10_60_80_034w  | 610 | 60 | 80 F  |
| NIST610_10_60_80_034w  | 610 | 60 | 80 F  |
| NIST610_10_60_80_035w  | 610 | 60 | 80 F  |
| NIST610_10_60_80_035w  | 610 | 60 | 80 F  |
| NIST610_10_60_80_035w  | 610 | 60 | 80 F  |
| NIST610_10_60_80_036w  | 610 | 60 | 80 F  |
| NIST610_10_60_80_036w  | 610 | 60 | 80 F  |
| NIST610_10_60_80_036w  | 610 | 60 | 80 F  |
| NIST610_10_80_80_019_u | 610 | 80 | 80 F  |
| NIST610_10_80_80_019_u | 610 | 80 | 80 F  |
| NIST610_10_80_80_019_u | 610 | 80 | 80 F  |
| NIST610_10_80_80_020_u | 610 | 80 | 80 F  |
| NIST610_10_80_80_020_u | 610 | 80 | 80 F  |
| NIST610_10_80_80_020_u | 610 | 80 | 80 F  |
| NIST610_10_80_80_021_u | 610 | 80 | 80 F  |
| NIST610_10_80_80_021_u | 610 | 80 | 80 F  |
| NIST610_10_80_80_021_u | 610 | 80 | 80 F  |
| NIST610_10_80_80_022_u | 610 | 80 | 80 F  |
| NIST610_10_80_80_022_u | 610 | 80 | 80 F  |
| NIST610_10_80_80_022_u | 610 | 80 | 80 F  |
| NIST612_10_40_45_002w  | 612 | 40 | 45 F  |
| NIST612_10_40_45_002w  | 612 | 40 | 45 F  |
| NIST612_10_40_45_002w  | 612 | 40 | 45 F  |
| NIST612_10_40_45_001w  | 612 | 40 | 45 F  |
| NIST612_10_40_45_001w  | 612 | 40 | 45 F  |
| NIST612_10_40_45_001w  | 612 | 40 | 45 F  |
| NIST612_10_80_45_03w   | 612 | 80 | 45 F  |
| NIST612_10_80_45_03w   | 612 | 80 | 45 F  |
| NIST612_10_80_45_03w   | 612 | 80 | 45 F  |
| NIST612_10_55_45_004w  | 612 | 55 | 45 F  |
| NIST612_10_55_45_004w  | 612 | 55 | 45 F  |

|                       |     |    |      |
|-----------------------|-----|----|------|
| NIST612_10_55_45_004w | 612 | 55 | 45 F |
| NIST612_10_55_45_005w | 612 | 55 | 45 F |
| NIST612_10_55_45_005w | 612 | 55 | 45 F |
| NIST612_10_55_45_005w | 612 | 55 | 45 F |
| NIST612_10_55_75_061w | 612 | 55 | 75 F |
| NIST612_10_55_75_061w | 612 | 55 | 75 F |
| NIST612_10_55_75_061w | 612 | 55 | 75 F |
| NIST612_10_55_75_063w | 612 | 55 | 75 F |
| NIST612_10_55_75_063w | 612 | 55 | 75 F |
| NIST612_10_55_75_063w | 612 | 55 | 75 F |
| NIST612_10_55_75_061w | 612 | 55 | 75 F |
| NIST612_10_55_75_061w | 612 | 55 | 75 F |
| NIST612_10_55_75_061w | 612 | 55 | 75 F |
| NIST612_10_55_75_061w | 612 | 55 | 75 F |
| NIST612_10_55_75_061w | 612 | 55 | 75 F |
| NIST612_10_55_75_061w | 612 | 55 | 75 F |
| NIST612_10_55_75_061w | 612 | 55 | 75 F |
| NIST612_10_60_45_009w | 612 | 60 | 45 F |
| NIST612_10_60_45_009w | 612 | 60 | 45 F |
| NIST612_10_60_45_009w | 612 | 60 | 45 F |
| NIST612_10_60_45_009w | 612 | 60 | 45 F |
| NIST612_10_60_45_009w | 612 | 60 | 45 F |
| NIST612_10_60_45_009w | 612 | 60 | 45 F |
| NIST612_10_60_45_008w | 612 | 60 | 45 F |
| NIST612_10_60_45_008w | 612 | 60 | 45 F |
| NIST612_10_60_45_008w | 612 | 60 | 45 F |
| NIST612_10_60_45_007w | 612 | 60 | 45 F |
| NIST612_10_60_45_007w | 612 | 60 | 45 F |
| NIST612_10_60_45_007w | 612 | 60 | 45 F |
| NIST612_10_80_70_055w | 612 | 80 | 70 F |
| NIST612_10_80_70_055w | 612 | 80 | 70 F |
| NIST612_10_80_70_055w | 612 | 80 | 70 F |
| NIST612_10_80_70_020w | 612 | 80 | 70 F |
| NIST612_10_80_70_020w | 612 | 80 | 70 F |
| NIST612_10_80_70_020w | 612 | 80 | 70 F |
| NIST612_10_80_70_019w | 612 | 80 | 70 F |
| NIST612_10_80_70_019w | 612 | 80 | 70 F |
| NIST612_10_80_70_019w | 612 | 80 | 70 F |
| NIST612_10_80_70_020w | 612 | 80 | 70 F |
| NIST612_10_80_70_020w | 612 | 80 | 70 F |
| NIST612_10_80_70_020w | 612 | 80 | 70 F |
| NIST612_10_80_70_020w | 612 | 80 | 70 F |
| NIST612_10_80_70_053w | 612 | 80 | 70 F |
| NIST612_10_80_70_053w | 612 | 80 | 70 F |
| NIST612_10_80_70_053w | 612 | 80 | 70 F |
| NIST612_10_80_70_056w | 612 | 80 | 70 F |
| NIST612_10_80_70_056w | 612 | 80 | 70 F |
| NIST612_10_80_70_056w | 612 | 80 | 70 F |
| NIST612_10_80_90_059w | 612 | 80 | 90 F |
| NIST612_10_80_90_059w | 612 | 80 | 90 F |
| NIST612_10_80_90_059w | 612 | 80 | 90 F |
| NIST612_10_80_90_058w | 612 | 80 | 90 F |

|                        |     |     |      |
|------------------------|-----|-----|------|
| NIST612_10_80_90_058w  | 612 | 80  | 90 F |
| NIST612_10_80_90_058w  | 612 | 80  | 90 F |
| NIST612_10_80_90_027w  | 612 | 80  | 90 F |
| NIST612_10_80_90_027w  | 612 | 80  | 90 F |
| NIST612_10_80_90_027w  | 612 | 80  | 90 F |
| NIST612_10_80_90_025w  | 612 | 80  | 90 F |
| NIST612_10_80_90_025w  | 612 | 80  | 90 F |
| NIST612_10_80_90_025w  | 612 | 80  | 90 F |
| NIST612_10_100_45_48w  | 612 | 100 | 45 F |
| NIST612_10_100_45_48w  | 612 | 100 | 45 F |
| NIST612_10_100_45_48w  | 612 | 100 | 45 F |
| NIST612_10_100_45_47w  | 612 | 100 | 45 F |
| NIST612_10_100_45_47w  | 612 | 100 | 45 F |
| NIST612_10_100_45_47w  | 612 | 100 | 45 F |
| NIST612_10_100_45_46w  | 612 | 100 | 45 F |
| NIST612_10_100_45_46w  | 612 | 100 | 45 F |
| NIST612_10_100_45_46w  | 612 | 100 | 45 F |
| NIST612_10_100_45_015w | 612 | 100 | 45 F |
| NIST612_10_100_45_015w | 612 | 100 | 45 F |
| NIST612_10_100_45_015w | 612 | 100 | 45 F |
| NIST612-10-55-40-038-p | 612 | 55  | 40 F |
| NIST612-10-55-40-038-p | 612 | 55  | 40 F |
| NIST612-10-55-40-038-p | 612 | 55  | 40 F |
| NIST612-10-55-40-039-p | 612 | 55  | 40 F |
| NIST612-10-55-40-039-p | 612 | 55  | 40 F |
| NIST612-10-55-40-039-p | 612 | 55  | 40 F |
| NIST612-10-55-40-040-p | 612 | 55  | 40 F |
| NIST612-10-55-40-040-p | 612 | 55  | 40 F |
| NIST612-10-55-40-040-p | 612 | 55  | 40 F |
| NIST612-10-55-40-059-p | 612 | 55  | 40 F |
| NIST612-10-55-40-059-p | 612 | 55  | 40 F |
| NIST612-10-55-40-059-p | 612 | 55  | 40 F |
| NIST612-20-12-50-001-p | 612 | 12  | 50 F |
| NIST612-20-12-50-001-p | 612 | 12  | 50 F |
| NIST612-20-12-50-001-p | 612 | 12  | 50 F |
| NIST612-20-12-50-10-q  | 612 | 12  | 50 F |
| NIST612-20-12-50-10-q  | 612 | 12  | 50 F |
| NIST612-20-12-50-10-q  | 612 | 12  | 50 F |
| NIST612-20-12-50-021-p | 612 | 12  | 50 F |
| NIST612-20-12-50-021-p | 612 | 12  | 50 F |
| NIST612-20-12-50-021-p | 612 | 12  | 50 F |

|             |            |             |         |
|-------------|------------|-------------|---------|
| 9.45E-01    | 2.120E-06  | 4.21E-02    | Pb07/06 |
| 9.44E-01    | 4.190E-06  | 1.00E-01    | Pb07/06 |
| 9.45E-01    | 2.820E-06  | 7.76E-02    | Pb07/06 |
| 9.47E-01    | 3.900E-07  | 9.61E-03    | Pb07/06 |
| 9.46E-01    | 1.820E-06  | 3.86E-02    | Pb07/06 |
| 9.47E-01    | 4.820E-06  | 7.19E-02    | Pb07/06 |
| 9.47E-01    | 3.140E-06  | 4.35E-02    | Pb07/06 |
| 9.49E-01    | -3.860E-06 | -5.64E-02   | Pb07/06 |
| 9.46E-01    | 3.560E-06  | 5.09E-02    | Pb07/06 |
| 9.45E-01    | 5.000E-06  | 7.30E-02    | Pb07/06 |
| 9.46E-01    | 4.690E-07  | 9.60E-03    | Pb07/06 |
| 0.943196134 | 8.550E-06  | 0.19438568  | Pb07/06 |
| 0.946992328 | -1.750E-06 | -0.04191174 | Pb07/06 |
| 0.947019113 | -6.740E-07 | 0.01640054  | Pb07/06 |
| 0.944340559 | 4.550E-06  | 0.09772737  | Pb07/06 |
| 0.948259089 | -9.070E-07 | -0.02309177 | Pb07/06 |
| 0.947336404 | 1.110E-06  | 0.02550369  | Pb07/06 |
| 0.943395667 | 1.140E-05  | 0.2653773   | Pb07/06 |
| 0.949241762 | -4.550E-06 | -0.09305192 | Pb07/06 |
| 0.94884982  | -5.290E-06 | -0.11423585 | Pb07/06 |
| 0.947704482 | 3.960E-06  | 0.10291761  | Pb07/06 |
| 0.948074085 | 9.930E-07  | 0.02349269  | Pb07/06 |
| 0.94842571  | 2.860E-06  | 0.03436475  | Pb07/06 |
| 0.947258662 | 3.350E-06  | 0.05724083  | Pb07/06 |
| 0.936271603 | 3.690E-06  | 0.046274    | Pb07/06 |
| 0.939250012 | -5.550E-06 | -0.06247559 | Pb07/06 |
| 0.939282329 | -6.960E-07 | -0.00948755 | Pb07/06 |
| 0.937509151 | 2.400E-06  | 0.07017144  | Pb07/06 |
| 0.937262167 | 3.130E-06  | 0.08264001  | Pb07/06 |
| 2.482477782 | -1.600E-06 | -0.00981356 | Pb08/07 |
| 2.463959391 | 3.810E-05  | 0.18825968  | Pb08/07 |
| 2.442759681 | 1.920E-05  | 0.12456504  | Pb08/07 |
| 2.488803835 | 4.190E-06  | 0.03421799  | Pb08/07 |
| 2.484717066 | 9.650E-06  | 0.06202003  | Pb08/07 |
| 2.488254949 | -1.040E-06 | -0.00376686 | Pb08/07 |
| 2.4841669   | 6.320E-06  | 0.03511698  | Pb08/07 |
| 2.489478908 | -4.220E-06 | -0.01821051 | Pb08/07 |
| 2.477818147 | 2.990E-05  | 0.14414024  | Pb08/07 |
| 2.481600977 | 1.850E-05  | 0.10842826  | Pb08/07 |
| 2.467714627 | 1.560E-05  | 0.19706215  | Pb08/07 |
| 2.466282508 | 5.480E-06  | 0.0319465   | Pb08/07 |
| 2.457570608 | 3.630E-05  | 0.1454657   | Pb08/07 |
| 2.45875084  | 3.120E-05  | 0.13713516  | Pb08/07 |
| 2.459868775 | 4.540E-05  | 0.17267636  | Pb08/07 |
| 2.470422526 | 2.800E-05  | 0.1112071   | Pb08/07 |
| 2.472319309 | 1.610E-05  | 0.08207012  | Pb08/07 |
| 2.472319309 | 1.610E-05  | 0.08207012  | Pb08/07 |
| 2.473418042 | 1.310E-05  | 0.04311982  | Pb08/07 |
| 2.471674032 | 2.590E-05  | 0.09522857  | Pb08/07 |
| 2.471669165 | 2.540E-05  | 0.11348061  | Pb08/07 |

|             |            |             |         |
|-------------|------------|-------------|---------|
| 2.486320581 | -1.970E-06 | -0.00722415 | Pb08/07 |
| 2.485912929 | 9.900E-06  | 0.0471267   | Pb08/07 |
| 2.491478045 | -1.040E-05 | -0.04662383 | Pb08/07 |
| 2.49151181  | -1.070E-05 | -0.044421   | Pb08/07 |
| 2.484333202 | 3.080E-06  | 0.01085523  | Pb08/07 |
| 2.487659801 | -2.390E-05 | -0.09641364 | Pb08/07 |
| 2.477073411 | 1.170E-05  | 0.07564938  | Pb08/07 |
| 0.923380677 | 1.010E-05  | 0.09100464  | Pb07/06 |
| 0.926457247 | 5.750E-06  | 0.04405785  | Pb07/06 |
| 0.925924367 | 3.700E-06  | 0.04548682  | Pb07/06 |
| 0.928538749 | -1.920E-07 | -0.00276576 | Pb07/06 |
| 0.928502012 | 9.660E-07  | 0.01122315  | Pb07/06 |
| 0.928438904 | -2.580E-06 | -0.03266735 | Pb07/06 |
| 0.923223587 | 5.020E-06  | 0.07004184  | Pb07/06 |
| 0.906471495 | 4.880E-05  | 0.24165902  | Pb07/06 |
| 0.92819045  | -4.930E-06 | -0.04448181 | Pb07/06 |
| 0.925362216 | 2.920E-06  | 0.0409438   | Pb07/06 |
| 0.926670918 | 2.300E-06  | 0.02357235  | Pb07/06 |
| 0.926598953 | 2.590E-06  | 0.02602602  | Pb07/06 |
| 0.924074591 | 1.700E-06  | 0.01627988  | Pb07/06 |
| 0.924986081 | 2.320E-06  | 0.03617501  | Pb07/06 |
| 0.923605226 | -5.950E-06 | -0.05052929 | Pb07/06 |
| 0.921900677 | 4.680E-06  | 0.05415055  | Pb07/06 |
| 0.924160493 | 1.210E-06  | 0.01282971  | Pb07/06 |
| 0.931519955 | -6.100E-06 | -0.06162867 | Pb07/06 |
| 0.931379583 | -6.500E-06 | -0.05928503 | Pb07/06 |
| 0.929477704 | -5.510E-08 | -0.00070514 | Pb07/06 |
| 0.926128588 | 5.560E-07  | 0.00751798  | Pb07/06 |
| 0.921671899 | -4.470E-07 | -0.00431264 | Pb07/06 |
| 0.929853243 | -8.310E-07 | -0.01129984 | Pb07/06 |
| 0.921470638 | 1.490E-05  | 0.12775032  | Pb07/06 |
| 0.925289758 | -1.980E-06 | -0.02224849 | Pb07/06 |
| 0.925786327 | 4.540E-07  | 0.00451271  | Pb07/06 |
| 0.927146411 | -6.590E-06 | -0.060077   | Pb07/06 |
| 0.925334235 | 4.330E-07  | 0.00506913  | Pb07/06 |
| 0.925610265 | -4.630E-07 | -0.00545947 | Pb07/06 |
| 0.929232089 | -9.840E-06 | -0.13608779 | Pb07/06 |
| 0.929232089 | -9.840E-06 | -0.13608779 | Pb07/06 |
| 0.925469053 | 2.860E-06  | 0.03541044  | Pb07/06 |
| 0.926117414 | -5.430E-06 | -0.06503807 | Pb07/06 |
| 0.92642831  | -6.910E-07 | -0.0109673  | Pb07/06 |
| 0.925710356 | 1.420E-06  | 0.01862365  | Pb07/06 |
| 0.926914044 | 4.440E-07  | 0.00807096  | Pb07/06 |
| 0.926185954 | -1.140E-06 | -0.01511966 | Pb07/06 |
| 0.928945666 | -3.220E-06 | -0.0301325  | Pb07/06 |
| 0.9260418   | -9.700E-07 | -0.01264143 | Pb07/06 |
| 0.928008032 | -3.950E-06 | -0.04118006 | Pb07/06 |
| 0.930646089 | -3.650E-06 | -0.0446695  | Pb07/06 |
| 2.47941981  | 1.470E-05  | 0.05308072  | Pb08/07 |
| 2.483834932 | 7.820E-06  | 0.02679625  | Pb08/07 |

|             |            |             |         |
|-------------|------------|-------------|---------|
| 2.487378608 | 7.850E-06  | 0.03410693  | Pb08/07 |
| 2.489068439 | -7.650E-06 | -0.031088   | Pb08/07 |
| 2.479208023 | 2.200E-05  | 0.1347939   | Pb08/07 |
| 2.494612301 | -8.760E-06 | -0.04043334 | Pb08/07 |
| 2.495758358 | -1.770E-05 | -0.08104218 | Pb08/07 |
| 2.499549979 | -1.740E-05 | -0.07994388 | Pb08/07 |
| 2.49391597  | -1.320E-05 | -0.0619933  | Pb08/07 |
| 2.488805417 | -5.520E-06 | -0.02582477 | Pb08/07 |
| 2.48954461  | 1.310E-05  | 0.0606097   | Pb08/07 |
| 2.447600481 | 5.690E-05  | 0.24640041  | Pb08/07 |
| 2.476986863 | 1.020E-05  | 0.04384834  | Pb08/07 |
| 2.479665433 | 2.450E-05  | 0.10664195  | Pb08/07 |
| 2.47570861  | 2.900E-06  | 0.01215177  | Pb08/07 |
| 2.491036178 | -3.620E-06 | -0.01468905 | Pb08/07 |
| 2.480620467 | 3.860E-06  | 0.01673777  | Pb08/07 |
| 2.490398809 | 1.110E-06  | 0.00456096  | Pb08/07 |
| 2.488139039 | -8.840E-07 | -0.00388416 | Pb08/07 |
| 2.456387289 | 2.420E-05  | 0.1077512   | Pb08/07 |
| 2.478922638 | 5.400E-06  | 0.02699961  | Pb08/07 |
| 2.479208023 | 2.200E-05  | 0.1347939   | Pb08/07 |
| 2.479208023 | 2.200E-05  | 0.1347939   | Pb08/07 |
| 2.494612301 | -8.760E-06 | -0.04043334 | Pb08/07 |
| 2.495758358 | -1.770E-05 | -0.08104218 | Pb08/07 |
| 2.499549979 | -1.740E-05 | -0.07994388 | Pb08/07 |
| 2.49391597  | -1.320E-05 | -0.0619933  | Pb08/07 |
| 2.488805417 | -5.520E-06 | -0.02582477 | Pb08/07 |
| 2.48954461  | 1.310E-05  | 0.0606097   | Pb08/07 |
| 2.447600481 | 5.690E-05  | 0.24640041  | Pb08/07 |
| 2.476986863 | 1.020E-05  | 0.04384834  | Pb08/07 |
| 2.479665433 | 2.450E-05  | 0.10664195  | Pb08/07 |
| 2.47570861  | 2.900E-06  | 0.01215177  | Pb08/07 |
| 2.491036178 | -3.620E-06 | -0.01468905 | Pb08/07 |
| 2.480620467 | 3.860E-06  | 0.01673777  | Pb08/07 |
| 2.490398809 | 1.110E-06  | 0.00456096  | Pb08/07 |
| 2.488139039 | -8.840E-07 | -0.00388416 | Pb08/07 |
| 2.492086463 | 1.540E-06  | 0.00645139  | Pb08/07 |
| 2.503238378 | 3.350E-05  | -0.14412039 | Pb08/07 |
| 2.492076477 | 7.660E-06  | 0.03504593  | Pb08/07 |
| 2.49075547  | 2.330E-05  | 0.10190001  | Pb08/07 |
| 2.643187175 | -5.084E-04 | -0.11086878 | Pb08/07 |
| 2.493522912 | 1.090E-05  | 0.04965675  | Pb08/07 |
| 2.498688855 | -1.270E-05 | -0.05625973 | Pb08/07 |
| 2.496587507 | -4.890E-06 | -0.02401066 | Pb08/07 |
| 2.491625889 | 1.160E-05  | 0.04515976  | Pb08/07 |
| 2.486259435 | -6.540E-07 | -0.00285934 | Pb08/07 |
| 2.494970174 | -1.970E-05 | -0.08843556 | Pb08/07 |
| 2.491405385 | -5.400E-07 | -2.48E+14   | Pb08/07 |
| 2.487478559 | 1.100E-05  | 0.04580653  | Pb08/07 |
| 2.508800005 | -2.760E-05 | -0.16920055 | Pb08/07 |
| 2.508088306 | -1.600E-05 | -0.09476572 | Pb08/07 |

|             |                 |             |         |
|-------------|-----------------|-------------|---------|
| 2.49933766  | -6.230E-07      | -0.00370058 | Pb08/07 |
| 2.502976932 | -1.520E-05      | -0.09000781 | Pb08/07 |
| 2.504082724 | -9.820E-06      | -0.05549035 | Pb08/07 |
| 2.5005132   | -1.350E-06      | -0.00723996 | Pb08/07 |
| 2.503653432 | -7.900E-06      | -0.04505392 | Pb08/07 |
| 2.499979192 | 7.250E-06       | 0.04273675  | Pb08/07 |
| 2.50276639  | 7.650E-07       | 0.00414335  | Pb08/07 |
| 2.501833118 | 1.700E-06       | 0.00864483  | Pb08/07 |
| 2.499085185 | -1.480E-06      | -0.0084112  | Pb08/07 |
| 2.479611272 | -8.770E-06      | -0.04857661 | Pb08/07 |
| 2.47642686  | 2.210E-05       | 0.13588726  | Pb08/07 |
| 2.482707048 | 1.890E-05       | 0.07775379  | Pb08/07 |
| 2.483733216 | 1.150E-05       | 0.05206156  | Pb08/07 |
| 2.489353652 | 6.040E-07       | 0.0025253   | Pb08/07 |
| 2.497432667 | -1.150E-05      | -0.05381822 | Pb08/07 |
| 2.390174888 | 3.470E-05       | 0.04755453  | Pb08/07 |
| 0.878032057 | -2.660E-06      | -0.00825355 | Pb08/07 |
| 2.417856516 | 8.170E-06       | 0.01218658  | Pb08/07 |
| 0.875358373 | -5.340E-06      | -0.01916971 | Pb07/06 |
| 2.414649746 | 1.460E-05       | -0.01740179 | Pb08/07 |
| 0.874216612 | 5.690E-06       | 0.01490654  | Pb07/06 |
| 2.41832242  | -3.800E-05      | -0.05018612 | Pb08/07 |
| 0.865494797 | 1.860E-05       | 0.05742315  | Pb07/06 |
| 2.416000125 | 2.020E-05       | 0.02772023  | Pb08/07 |
| 0.867790779 | 1.070E-05       | 0.03413247  | Pb07/06 |
| 2.408435425 | 4.770E-05       | 0.05610342  | Pb08/07 |
| 0.871516896 | 2.090E-06       | 0.0056292   | Pb07/06 |
| 2.419602367 | -2.500E-05      | -0.02610881 | Pb08/07 |
| 0.875319741 | 9.940E-06       | 0.02322231  | Pb07/06 |
| 2.413829608 | 7.110E-06       | 0.00968449  | Pb08/07 |
| 0.870356125 | 3.770E-06       | 0.01229831  | Pb07/06 |
| 2.424108229 | -4.110E-05      | -0.05027262 | Pb08/07 |
| 0.870575317 | 9.700E-06       | 0.02827864  | Pb07/06 |
| 2.409612234 | -4.380E-05      | -0.0439221  | Pb08/07 |
| 0.875551349 | 1.020E-05       | 0.02337006  | Pb07/06 |
| 2.409612234 | -4.380E-05      | -0.0439221  | Pb08/07 |
| 0.875551349 | 1.020E-05       | 0.02337006  | Pb07/06 |
| 2.421023348 | -9.120E-06      | -0.01393361 | Pb08/07 |
| 0.868036836 | 2.050E-06       | 0.00741041  | Pb07/06 |
| 2.409873754 | 3.580E-05       | 0.05126657  | Pb08/07 |
| 0.874392079 | 2.330E-06       | 0.00793248  | Pb07/06 |
| 2.420912552 | 2.090E-06       | 0.00348099  | Pb08/07 |
| 0.866085365 | 3.750E-06       | 0.0139687   | Pb07/06 |
| 2.408157135 | 9.260E-06       | 0.01648387  | Pb08/07 |
| 0.871413116 | -1.010E-06      | -0.00399412 | Pb07/06 |
| 2.414966217 | 7.030E-06       | 0.01186377  | Pb08/07 |
| 0.875576395 | -2.895754632833 | 0.01080507  | Pb07/06 |
| 2.414609503 | -2.35893690410C | 0.03035455  | Pb08/07 |
| 0.872811337 | -1.370E-06      | -0.00415442 | Pb07/06 |
| 2.419533731 | -2.110E-06      | -0.00358787 | Pb08/07 |

|             |            |             |         |
|-------------|------------|-------------|---------|
| 0.866007989 | 4.220E-06  | 0.0160753   | Pb07/06 |
| 2.411212525 | -4.800E-06 | -0.00893993 | Pb08/07 |
| 0.869810832 | 1.210E-05  | 0.05288451  | Pb07/06 |
| 2.417847707 | -3.780E-06 | -0.00748055 | Pb08/07 |
| 0.868954223 | 2.910E-07  | 0.00130401  | Pb07/06 |
| 2.404725909 | 1.870E-05  | 0.03593893  | Pb08/07 |
| 0.870905055 | 1.030E-06  | 0.00462032  | Pb07/06 |
| 2.429936122 | -2.210E-05 | -0.03602573 | Pb08/07 |
| 0.869585994 | -7.460E-07 | -0.00286637 | Pb07/06 |
| 2.405419222 | 2.660E-05  | 0.03977164  | Pb08/07 |
| 0.872219898 | -5.390E-06 | -0.01936905 | Pb07/06 |
| 2.416730301 | -1.590E-05 | -0.02191353 | Pb08/07 |
| 0.870146388 | 2.670E-06  | 0.00862814  | Pb07/06 |
| 2.420927786 | -2.170E-05 | -0.03837518 | Pb08/07 |
| 0.87291117  | -3.310E-06 | -0.0129695  | Pb07/06 |
| 2.417884799 | -1.540E-05 | -0.02368221 | Pb08/07 |
| 0.87655021  | -3.970E-06 | -0.0140232  | Pb07/06 |
| 2.412050437 | 1.740E-05  | 0.03245838  | Pb08/07 |
| 2.386450069 | -4.030E-06 | -0.00818432 | Pb08/07 |
| 0.91153231  | -1.260E-06 | -0.00562729 | Pb07/06 |
| 2.396096013 | -5.350E-06 | -0.00764866 | Pb08/07 |
| 0.906483319 | -9.380E-06 | -0.02817579 | Pb07/06 |
| 2.378527137 | 5.760E-06  | 0.01124894  | Pb08/07 |
| 0.909641845 | 1.030E-06  | 0.00425354  | Pb07/06 |
| 2.386390781 | -5.190E-05 | -0.03182289 | Pb08/07 |
| 0.906237379 | 4.420E-05  | 0.06460618  | Pb07/06 |
| 2.412774892 | -1.590E-05 | -0.04080673 | Pb08/07 |
| 0.867545272 | 1.010E-05  | 0.05925709  | Pb07/06 |
| 2.383971614 | 3.840E-05  | 0.06247476  | Pb08/07 |
| 0.910480428 | -2.420E-05 | -0.07815412 | Pb07/06 |
| 2.3824946   | 2.180E-05  | 0.05036747  | Pb08/07 |
| 0.910195622 | 4.900E-06  | 0.0234362   | Pb07/06 |
| 0.91093525  | -1.730E-05 | -0.07270822 | Pb07/06 |
| 2.394515436 | -3.990E-05 | -0.06795224 | Pb08/07 |
| 0.903675501 | 2.330E-05  | 0.08442229  | Pb07/06 |
| 2.411973217 | -1.180E-05 | -0.06998525 | Pb08/07 |
| 0.871102173 | -7.520E-08 | -0.00106449 | Pb07/06 |
| 2.413112797 | -1.130E-06 | -0.00640431 | Pb08/07 |
| 0.870491962 | 3.540E-06  | 0.04735342  | Pb07/06 |
| 2.411768248 | -5.160E-06 | -0.02881112 | Pb08/07 |
| 0.870426378 | 2.260E-06  | 0.0313231   | Pb07/06 |
| 2.407842393 | 1.550E-05  | 0.08410335  | Pb08/07 |
| 0.8742782   | -1.090E-05 | -0.13182964 | Pb07/06 |
| 2.411428652 | 4.400E-06  | 0.02768916  | Pb08/07 |
| 0.871185678 | -1.280E-06 | -0.01804371 | Pb07/06 |
| 2.413186458 | 6.310E-06  | 0.02957431  | Pb08/07 |
| 0.870028156 | -1.360E-06 | -0.0153202  | Pb07/06 |
| 2.414386074 | -1.070E-05 | -0.05118035 | Pb08/07 |
| 0.869333959 | 7.040E-06  | 0.0763728   | Pb07/06 |
| 2.410193209 | 1.340E-05  | 0.04947928  | Pb08/07 |

|             |            |             |         |
|-------------|------------|-------------|---------|
| 0.872687223 | -1.100E-05 | -0.09253075 | Pb07/06 |
| 2.405968132 | 7.000E-06  | 0.03277122  | Pb08/07 |
| 0.872329886 | 2.500E-06  | 0.02662263  | Pb07/06 |
| 2.406258465 | 4.730E-06  | 0.02385737  | Pb08/07 |
| 0.872742358 | 5.110E-07  | 0.00595034  | Pb07/06 |
| 2.406258465 | 4.730E-06  | 0.02385737  | Pb08/07 |
| 0.872742358 | 5.110E-07  | 0.00595034  | Pb07/06 |
| 2.409119304 | -2.860E-06 | -0.01528226 | Pb08/07 |
| 0.870411947 | 2.710E-06  | 0.03270992  | Pb07/06 |
| 2.409119304 | -2.860E-06 | -0.01528226 | Pb08/07 |
| 0.870411947 | 2.710E-06  | 0.03270992  | Pb07/06 |
| 2.409377417 | 1.800E-05  | 0.08886842  | Pb08/07 |
| 0.873595176 | -8.530E-06 | -0.09277033 | Pb07/06 |
| 2.41513976  | -4.420E-06 | -0.0184614  | Pb08/07 |
| 0.869619644 | 3.050E-06  | 0.02850733  | Pb07/06 |
| 2.416459947 | -9.120E-06 | -0.03575932 | Pb08/07 |
| 0.870065139 | 3.960E-06  | 0.03551419  | Pb07/06 |
| 2.413502692 | 2.410E-07  | 0.00092912  | Pb08/07 |
| 0.871117988 | -1.850E-06 | -0.01736372 | Pb07/06 |
| 2.413502692 | 2.410E-07  | 0.00092912  | Pb08/07 |
| 0.871117988 | -1.850E-06 | -0.01736372 | Pb07/06 |
| 2.409294545 | 2.100E-05  | 0.1004758   | Pb08/07 |
| 0.872021833 | -4.220E-06 | -0.04771731 | Pb07/06 |
| 2.410649906 | -5.340E-06 | -0.02492548 | Pb08/07 |
| 0.872508272 | 1.570E-06  | 0.01794257  | Pb07/06 |
| 2.412282526 | -2.660E-06 | -0.01210265 | Pb08/07 |
| 0.871196065 | 2.100E-06  | 0.02159235  | Pb07/06 |
| 2.565501584 | 1.340E-04  | 0.20572906  | Pb08/07 |
| 2.566495537 | 1.101E-04  | 0.19016763  | Pb08/07 |
| 2.569877845 | 1.111E-04  | 0.255792    | Pb08/07 |
| 0.979877369 | 2.300E-05  | 0.08549779  | Pb07/06 |
| 0.979877369 | 2.300E-05  | 0.08549779  | Pb07/06 |
| 0.978972518 | 8.020E-05  | 0.14446508  | Pb07/06 |
| 0.983935657 | -2.460E-05 | -0.06521215 | Pb07/06 |
| 2.565713819 | 7.850E-05  | 0.12228159  | Pb08/07 |
| 2.566830661 | 2.150E-05  | 0.06941707  | Pb08/07 |
| 2.573834386 | 5.430E-06  | 0.00665644  | Pb08/07 |
| 0.980665035 | 3.770E-05  | 0.09172687  | Pb07/06 |
| 2.53538879  | 1.306E-04  | 0.36899044  | Pb08/07 |
| 2.556205686 | 6.120E-05  | 0.2022875   | Pb08/07 |
| 2.552940935 | 9.680E-05  | 0.26897144  | Pb08/07 |
| 2.563673109 | 9.130E-05  | 0.25429189  | Pb08/07 |
| 0.975169176 | 1.810E-05  | 0.11431513  | Pb07/06 |
| 0.982836488 | 8.450E-06  | 0.0435464   | Pb07/06 |
| 0.982836488 | 8.450E-06  | 0.0435464   | Pb07/06 |
| 0.979940501 | 2.400E-05  | 0.15433137  | Pb07/06 |
| 0.983272876 | 1.330E-05  | 0.08901152  | Pb07/06 |
| 0.987149747 | 7.970E-06  | 0.06100408  | Pb07/06 |
| 0.990850636 | 1.270E-05  | 0.07720958  | Pb07/06 |
| 0.995264098 | 5.120E-06  | 0.03308581  | Pb07/06 |

|             |            |             |         |
|-------------|------------|-------------|---------|
| 0.99724364  | -1.050E-05 | -0.05825673 | Pb07/06 |
| 0.995128402 | -1.540E-06 | -0.01047853 | Pb07/06 |
| 0.996297562 | 3.610E-06  | 0.02323778  | Pb07/06 |
| 0.996682275 | 2.290E-06  | 0.01230798  | Pb07/06 |
| 0.995023776 | 2.350E-06  | 0.01467533  | Pb07/06 |
| 0.998938249 | 5.730E-06  | 0.0314813   | Pb07/06 |
| 0.993405015 | 2.790E-06  | 0.01535515  | Pb07/06 |
| 0.99299855  | 5.280E-06  | 0.02677538  | Pb07/06 |
| 0.992934335 | 6.850E-06  | 0.03590542  | Pb07/06 |
| 0.996104979 | -7.670E-06 | -0.0445714  | Pb07/06 |
| 0.996963647 | -9.670E-06 | -0.05263047 | Pb07/06 |
| 0.993990747 | -2.730E-07 | -0.00145729 | Pb07/06 |
| 0.947278888 | 9.140E-07  | 0.0051116   | Pb07/06 |
| 0.999196537 | 1.070E-05  | 0.15768835  | Pb07/06 |
| 0.999002964 | 1.480E-05  | 0.15036601  | Pb07/06 |
| 1.001286025 | 1.120E-05  | 0.11208259  | Pb07/06 |
| 1.000023317 | 1.430E-05  | 0.1641806   | Pb07/06 |
| 0.998136074 | 2.400E-05  | 0.25320587  | Pb07/06 |
| 1.001387123 | 7.740E-06  | 0.0708416   | Pb07/06 |
| 0.949429466 | -5.450E-05 | -0.18146429 | Pb07/06 |
| 0.949429466 | -5.450E-05 | -0.18146429 | Pb07/06 |
| 0.941556551 | 1.170E-05  | 0.03534928  | Pb07/06 |
| 0.929961161 | 8.350E-06  | 0.0239218   | Pb07/06 |
| 0.940306204 | 2.000E-05  | 0.07585026  | Pb07/06 |
| 2.59224411  | -1.870E-05 | -0.02619381 | Pb08/07 |
| 2.584972333 | 4.020E-05  | 0.04984275  | Pb08/07 |
| 2.582623225 | 6.710E-05  | 0.08438623  | Pb08/07 |
| 2.588737514 | 1.070E-05  | 0.01593509  | Pb08/07 |
| 2.598608209 | -3.990E-05 | -0.05243153 | Pb08/07 |
| 2.585670616 | 4.780E-06  | 0.01270935  | Pb08/07 |
| 2.587987788 | 1.720E-05  | 0.04409492  | Pb08/07 |
| 2.583964627 | 5.320E-05  | 0.08320514  | Pb08/07 |
| 2.595217262 | 1.510E-05  | 0.02122861  | Pb08/07 |
| 2.582577516 | 4.170E-05  | 0.06176473  | Pb08/07 |
| 2.607669057 | -2.760E-05 | -0.04350495 | Pb08/07 |
| 2.604131359 | 2.090E-06  | 0.00330947  | Pb08/07 |
| 2.607005954 | 3.220E-05  | 0.05559231  | Pb08/07 |
| 0.984879129 | -1.200E-06 | -0.00300756 | Pb07/06 |
| 0.989483509 | -9.380E-06 | -0.02931396 | Pb07/06 |
| 0.988643923 | -2.590E-05 | -0.08873588 | Pb07/06 |
| 2.753717147 | -2.340E-05 | -0.0434335  | Pb08/07 |
| 2.742958937 | 1.580E-05  | 0.02564446  | Pb08/07 |
| 2.743863557 | -1.800E-05 | -0.02987111 | Pb08/07 |
| 2.737673447 | 4.030E-06  | 0.00687923  | Pb08/07 |
| 2.7307106   | 1.690E-05  | 0.03125878  | Pb08/07 |
| 2.732643339 | -3.810E-06 | -0.00687432 | Pb08/07 |
| 0.983416279 | 5.550E-06  | 0.01889712  | Pb07/06 |
| 0.988104858 | -2.320E-06 | -0.00775773 | Pb07/06 |
| 0.988643923 | -2.590E-05 | -0.08873588 | Pb07/06 |
| 0.984690211 | 1.750E-05  | 0.06955138  | Pb07/06 |

|             |            |             |         |
|-------------|------------|-------------|---------|
| 0.985430767 | 5.260E-06  | 0.01912337  | Pb07/06 |
| 0.984287757 | -3.470E-06 | -0.015993   | Pb07/06 |
| 0.983725819 | -3.900E-06 | -0.01670346 | Pb07/06 |
| 0.980347584 | 2.080E-05  | 0.07331944  | Pb07/06 |
| 0.986017627 | -3.590E-05 | -0.1240834  | Pb07/06 |
| 0.982687408 | 1.530E-05  | 0.04286492  | Pb07/06 |
| 0.985323601 | -1.340E-06 | -0.00416998 | Pb07/06 |
| 0.984305594 | -1.250E-06 | -0.00365349 | Pb07/06 |
| 0.977849016 | 2.100E-05  | 0.05549053  | Pb07/06 |
| 0.978680043 | 2.580E-05  | 0.06997116  | Pb07/06 |
| 0.978849636 | 1.350E-06  | 0.00387143  | Pb07/06 |
| 0.972699467 | 3.920E-05  | 0.09152867  | Pb07/06 |
| 0.980603602 | -1.590E-05 | -0.0346426  | Pb07/06 |
| 0.976303314 | 2.890E-06  | 0.00740497  | Pb07/06 |
| 0.977941593 | 1.700E-05  | 0.04192879  | Pb07/06 |
| 0.988563575 | -4.990E-05 | -0.0726318  | Pb07/06 |
| 0.98248165  | -4.090E-05 | -0.0737665  | Pb07/06 |
| 0.963543242 | 6.980E-05  | 0.12559939  | Pb07/06 |
| 0.966243631 | 4.320E-05  | 0.0701789   | Pb07/06 |
| 0.982520733 | -1.960E-05 | -0.03382114 | Pb07/06 |
| 0.97602784  | 3.040E-05  | 0.03617346  | Pb07/06 |
| 0.97151531  | -5.660E-06 | -0.00661299 | Pb07/06 |
| 0.968229851 | -5.810E-06 | -0.02592397 | Pb07/06 |
| 0.97209117  | 1.560E-05  | 0.0602057   | Pb07/06 |
| 0.974950065 | 1.210E-05  | 0.04799691  | Pb07/06 |
| 0.976859562 | 2.230E-05  | 0.08695928  | Pb07/06 |
| 0.979150541 | 3.100E-05  | 0.19284043  | Pb07/06 |
| 0.9903941   | 2.930E-06  | 0.01590627  | Pb07/06 |
| 0.993393338 | 3.870E-06  | 0.01828143  | Pb07/06 |
| 0.993038779 | 1.450E-05  | 0.08332422  | Pb07/06 |
| 0.995960157 | 1.220E-05  | 0.06544212  | Pb07/06 |
| 0.99059621  | 2.170E-05  | 0.09122067  | Pb07/06 |
| 0.990870534 | 6.870E-06  | 0.02885082  | Pb07/06 |
| 0.990870534 | 6.870E-06  | 0.02885082  | Pb07/06 |
| 0.987591777 | 7.350E-06  | 0.02719802  | Pb07/06 |
| 0.988919836 | -1.790E-06 | -0.00710521 | Pb07/06 |
| 0.987893002 | -3.320E-06 | -0.01379055 | Pb07/06 |
| 0.607926571 | 1.230E-05  | 0.04996771  | Pb07/06 |
| 0.582979202 | 1.260E-05  | 0.05122772  | Pb07/06 |
| 0.558031834 | 1.290E-05  | 0.05248773  | Pb07/06 |
| 0.533084465 | 1.320E-05  | 0.05374773  | Pb07/06 |
| 0.508137097 | 1.350E-05  | 0.05500774  | Pb07/06 |
| 0.483189728 | 1.380E-05  | 0.05626775  | Pb07/06 |
| 0.982145283 | 1.460E-05  | 0.0524327   | Pb07/06 |
| 0.982253215 | 1.350E-05  | 0.05014672  | Pb07/06 |
| 2.700962629 | 5.630E-05  | 0.07961972  | Pb08/07 |
| 0.986057365 | -2.180E-05 | -0.07480356 | Pb07/06 |
| 2.696928024 | -2.340E-06 | -0.00325645 | Pb08/07 |
| 0.99110522  | -7.990E-06 | -0.03674645 | Pb07/06 |
| 0.982977458 | 2.170E-05  | 0.09864431  | Pb07/06 |

|             |            |             |         |
|-------------|------------|-------------|---------|
| 0.984763241 | 7.040E-06  | 0.02744117  | Pb07/06 |
| 0.980849921 | 2.320E-05  | 0.11789432  | Pb07/06 |
| 0.982126661 | 2.800E-05  | 0.12374354  | Pb07/06 |
| 2.644033774 | 1.050E-05  | 0.02041137  | Pb08/07 |
| 0.986057365 | -2.180E-05 | -0.07480356 | Pb07/06 |
| 2.694713638 | 3.210E-05  | 0.04830323  | Pb08/07 |
| 2.702101957 | -6.640E-06 | -0.00893941 | Pb08/07 |
| 2.710226219 | -6.990E-05 | -0.08666925 | Pb08/07 |
| 2.69936468  | -9.780E-06 | -0.01328637 | Pb08/07 |
| 2.702648639 | 2.200E-05  | 0.0388811   | Pb08/07 |
| 2.704846494 | 3.540E-05  | 0.06097147  | Pb08/07 |
| 2.644042839 | 1.570E-05  | 0.02571176  | Pb08/07 |
| 2.652669873 | 4.140E-05  | 0.07435235  | Pb08/07 |
| 2.698132391 | -2.210E-05 | -0.01880613 | Pb08/07 |
| 2.718997945 | -9.680E-05 | -0.09774015 | Pb08/07 |
| 2.68180335  | 5.340E-05  | 0.04356563  | Pb08/07 |
| 2.659907526 | -1.680E-05 | -0.01700008 | Pb08/07 |
| 2.660224565 | 1.770E-05  | 0.01596156  | Pb08/07 |
| 2.662407085 | -3.130E-06 | -0.00281341 | Pb08/07 |
| 2.656597897 | -2.830E-05 | -0.0222695  | Pb08/07 |
| 2.658273001 | 1.700E-05  | 0.0141727   | Pb08/07 |
| 2.660417627 | -5.290E-05 | -0.03279156 | Pb08/07 |
| 2.673190591 | -8.570E-05 | -0.05181861 | Pb08/07 |
| 2.641235901 | 5.090E-05  | 0.0382248   | Pb08/07 |
| 2.645002288 | 8.990E-05  | 0.05505565  | Pb08/07 |
| 2.587072047 | 3.435E-04  | 0.12741802  | Pb08/07 |
| 2.610116207 | 4.690E-05  | 0.02120849  | Pb08/07 |
| 2.63302745  | -2.270E-07 | -9.70E-05   | Pb08/07 |
| 2.630706053 | -3.440E-05 | -0.01693846 | Pb08/07 |
| 2.688190491 | 3.820E-05  | 0.10212311  | Pb08/07 |
| 2.694146584 | 1.420E-05  | 0.03256     | Pb08/07 |
| 2.690720107 | 4.770E-05  | 0.1133288   | Pb08/07 |
| 2.693754662 | 2.440E-05  | 0.06062602  | Pb08/07 |
| 2.693721608 | -5.930E-06 | -0.0128784  | Pb08/07 |
| 2.680321886 | 3.910E-05  | 0.07888396  | Pb08/07 |
| 2.681040203 | 3.100E-05  | 0.06187909  | Pb08/07 |
| 2.685991556 | -1.410E-05 | -0.02816722 | Pb08/07 |
| 2.678448807 | 2.500E-05  | 0.04776094  | Pb08/07 |
| 2.689090308 | 1.130E-05  | 0.02142757  | Pb08/07 |
| 2.687804642 | 3.300E-05  | 0.05961752  | Pb08/07 |
| 0.972602559 | 3.100E-05  | 0.12772667  | Pb07/06 |
| 0.974082187 | 1.480E-05  | 0.06404535  | Pb07/06 |
| 0.980372848 | -4.610E-06 | -0.02088589 | Pb07/06 |
| 0.980011965 | 1.840E-05  | 0.08593994  | Pb07/06 |
| 0.979070284 | -8.020E-06 | -0.03344292 | Pb07/06 |
| 2.48890579  | 7.060E-05  | 0.05575265  | Pb08/07 |
| 2.476620801 | 4.330E-05  | 0.05512979  | Pb08/07 |
| 2.482001617 | 2.180E-05  | 0.02395669  | Pb08/07 |
| 2.489606788 | -3.830E-05 | -0.04531604 | Pb08/07 |
| 2.478103498 | 6.540E-05  | 0.08144793  | Pb08/07 |

|             |            |             |         |
|-------------|------------|-------------|---------|
| 2.595703016 | -6.150E-06 | -0.01664337 | Pb08/07 |
| 2.589431446 | 2.770E-05  | 0.0810855   | Pb08/07 |
| 2.586984769 | 3.500E-05  | 0.09267925  | Pb08/07 |
| 2.586641389 | 4.090E-05  | 0.12485893  | Pb08/07 |
| 2.58838945  | 3.090E-05  | 0.08730598  | Pb08/07 |
| 2.579623468 | 8.610E-05  | 0.05529362  | Pb08/07 |
| 2.603424074 | -7.330E-05 | -0.05227791 | Pb08/07 |
| 2.582047838 | -8.950E-06 | -0.00619419 | Pb08/07 |
| 2.600958223 | 2.680E-05  | 0.01813401  | Pb08/07 |
| 2.578825416 | 1.150E-04  | 0.07667896  | Pb08/07 |
| 2.614594032 | -3.300E-05 | -0.0201325  | Pb08/07 |
| 2.531425678 | 1.890E-05  | 0.01032207  | Pb08/07 |
| 2.561968604 | -2.950E-05 | -0.01608184 | Pb08/07 |
| 2.565796711 | 2.460E-05  | 0.01123239  | Pb08/07 |
| 2.579803355 | -1.043E-04 | -0.05085562 | Pb08/07 |
| 2.586390441 | -1.401E-04 | -0.07043134 | Pb08/07 |
| 2.59701438  | -5.300E-05 | -0.02971968 | Pb08/07 |
| 0.977653848 | 4.219E-06  | 0.08922251  | Pb07/06 |
| 0.961079714 | -4.155E-06 | -0.09140781 | Pb07/06 |
| 0.962027683 | -1.121E-06 | -0.02810628 | Pb07/06 |
| 0.961036838 | 3.406E-06  | 0.08245818  | Pb07/06 |
| 0.960942638 | 1.620E-06  | 0.02994819  | Pb07/06 |
| 0.964565465 | 1.085E-06  | 0.02038487  | Pb07/06 |
| 0.964450351 | 1.223E-06  | 0.02496308  | Pb07/06 |
| 0.963308812 | 1.572E-06  | 0.02762769  | Pb07/06 |
| 0.962721348 | 5.164E-06  | 0.10011633  | Pb07/06 |
| 0.962756883 | -2.410E-07 | -0.00362846 | Pb07/06 |
| 0.964613872 | 1.524E-06  | 0.02426544  | Pb07/06 |
| 0.963438476 | 2.350E-06  | 0.04881217  | Pb07/06 |
| 0.936692801 | 2.326E-06  | 0.03220862  | Pb07/06 |
| 0.936037306 | 1.042E-05  | 0.11681547  | Pb07/06 |
| 0.963519979 | 3.788E-06  | 0.09762898  | Pb07/06 |
| 0.963519979 | 3.788E-06  | 0.09762898  | Pb07/06 |
| 0.962618515 | 9.686E-06  | 0.13164008  | Pb07/06 |
| 0.938945215 | 1.911E-07  | 0.00249023  | Pb07/06 |
| 0.965178004 | 4.236E-06  | 0.13116827  | Pb07/06 |
| 0.949636523 | -5.446E-06 | -0.11254701 | Pb07/06 |
| 0.949993138 | -8.323E-06 | -0.11451255 | Pb07/06 |
| 0.946992216 | -9.808E-08 | -0.00314289 | Pb07/06 |
| 0.948127811 | 2.116E-06  | 0.04573086  | Pb07/06 |
| 0.96450735  | 1.024E-06  | 0.02218599  | Pb07/06 |
| 0.947211233 | 4.072E-06  | 0.08727287  | Pb07/06 |
| 0.963438476 | 2.350E-06  | 0.04881217  | Pb07/06 |
| 0.936692801 | 2.326E-06  | 0.03220862  | Pb07/06 |
| 0.936037306 | 1.042E-05  | 0.11681547  | Pb07/06 |
| 0.963519979 | 3.788E-06  | 0.09762898  | Pb07/06 |
| 0.963519979 | 3.788E-06  | 0.09762898  | Pb07/06 |
| 0.962618515 | 9.686E-06  | 0.13164008  | Pb07/06 |
| 0.938945215 | 1.911E-07  | 0.00249023  | Pb07/06 |
| 0.965178004 | 4.236E-06  | 0.13116827  | Pb07/06 |

|             |            |             |         |
|-------------|------------|-------------|---------|
| 0.949636523 | -5.446E-06 | -0.11254701 | Pb07/06 |
| 0.949993138 | -8.323E-06 | -0.11451255 | Pb07/06 |
| 0.946992216 | -9.808E-08 | -0.00314289 | Pb07/06 |
| 0.948127811 | 2.116E-06  | 0.04573086  | Pb07/06 |
| 0.96450735  | 1.024E-06  | 0.02218599  | Pb07/06 |
| 0.947211233 | 4.072E-06  | 0.08727287  | Pb07/06 |
| 2.169502229 | -7.560E-06 | -0.35181159 | Pb08/06 |
| 2.384206284 | -1.737E-06 | -0.23394895 | Pb08/07 |
| 0.909947743 | -2.509E-06 | -0.07926051 | Pb07/06 |
| 2.169185809 | -3.129E-06 | -0.12711516 | Pb08/06 |
| 2.383992505 | -5.726E-07 | -0.02036925 | Pb08/07 |
| 0.909896645 | -1.094E-06 | -0.08618434 | Pb07/06 |
| 2.170270519 | -9.814E-06 | -0.38768549 | Pb08/06 |
| 2.384714201 | -3.455E-06 | -0.13086465 | Pb08/07 |
| 0.910076424 | -2.800E-06 | -0.21390044 | Pb07/06 |
| 2.168717867 | -3.069E-06 | -0.12287701 | Pb08/06 |
| 2.384037442 | -2.281E-06 | -0.07992026 | Pb08/07 |
| 0.909683327 | -4.178E-07 | -0.03232594 | Pb07/06 |
| 2.169431584 | -2.886E-06 | -0.10246566 | Pb08/06 |
| 2.384247998 | -1.180E-06 | -0.03201753 | Pb08/07 |
| 0.909902731 | -7.641E-07 | -0.0451329  | Pb07/06 |
| 2.169079673 | -2.015E-06 | -0.10049356 | Pb08/06 |
| 2.3843277   | -2.034E-06 | -0.08475769 | Pb08/07 |
| 0.909724143 | -6.892E-08 | -0.00637745 | Pb07/06 |
| 2.16865434  | -2.487E-06 | -0.1433079  | Pb08/06 |
| 2.384027752 | -1.038E-06 | -0.05106994 | Pb08/07 |
| 0.909660391 | -6.489E-07 | -0.0703856  | Pb07/06 |
| 2.168251812 | -2.702E-06 | -0.14283455 | Pb08/06 |
| 2.383672409 | -2.369E-06 |             | Pb08/07 |
| 0.909626881 | -2.296E-07 | -0.12486951 | Pb07/06 |
| 2.168453083 | -1.235E-06 | -0.0672776  | Pb08/06 |
| 2.3835183   | 4.661E-07  | 0.0250997   | Pb08/07 |
| 0.909770141 | -6.964E-07 | -0.0217643  | Pb07/06 |
| 2.169026794 | -4.130E-06 | -0.24465733 | Pb08/06 |
| 2.383921159 | -2.063E-06 | -0.12218938 | Pb08/07 |
| 0.909857004 | -9.457E-07 | -0.11035301 | Pb07/06 |
| 2.169076439 | -4.393E-06 | -0.26306606 | Pb08/06 |
| 2.383740862 | -4.726E-07 | -0.02810139 | Pb08/07 |
| 0.909946787 | -1.664E-06 | -0.17918559 | Pb07/06 |
| 2.124602448 | 1.053E-05  | 0.01396255  | Pb08/06 |
| 2.358797215 | 1.768E-05  |             | Pb08/07 |
| 0.901005818 | -6.858E-07 | -0.00151716 | Pb07/06 |
| 2.146913821 | -4.809E-06 |             | Pb08/06 |
| 2.382266989 | -8.322E-05 | -0.01031448 | Pb08/07 |
| 0.901176182 | 3.181E-05  | -0.14821831 | Pb07/06 |
| 2.174362591 | 2.139E-04  | 0.11933929  | Pb08/06 |
| 2.464055028 | 2.959E-05  | 0.06484274  | Pb08/07 |
| 0.881009747 | 1.706E-04  | 0.00657195  | Pb07/06 |
| 2.172936021 | 5.551E-06  | 0.08672687  | Pb08/06 |
| 2.380589569 | 3.058E-05  | 0.02854449  | Pb08/07 |

|             |            |             |         |
|-------------|------------|-------------|---------|
| 0.91279968  | -9.323E-06 | 0.12839166  | Pb07/06 |
| 2.171482065 | -2.663E-06 | -0.0873155  | Pb08/06 |
| 2.383379723 | 1.664E-06  | -0.01441264 | Pb08/07 |
| 0.911121316 | -1.675E-06 |             | Pb07/06 |
| 2.171979269 | -3.732E-05 | -0.01559644 | Pb08/06 |
| 2.393879809 | -3.124E-05 | -0.10153424 | Pb08/07 |
| 0.907347108 | -2.996E-06 | -0.06719843 | Pb07/06 |
| 2.169637722 | -1.675E-05 | -0.01480718 | Pb08/06 |
| 2.388199574 | 2.919E-06  | -0.04050329 | Pb08/07 |
| 0.90850058  | -7.227E-06 | 0.00636479  | Pb07/06 |
| 2.171238616 | -3.495E-05 | -0.03275211 | Pb08/06 |
| 2.392682336 | -2.611E-05 | -0.08658803 | Pb08/07 |
| 0.907506739 | -3.946E-06 | -0.05061761 | Pb07/06 |
| 2.169806908 | -2.850E-05 | -0.01753015 | Pb08/06 |
| 2.392292737 | -2.320E-05 | -0.05531909 | Pb08/07 |
| 0.907028812 | -2.379E-06 | -0.01291288 | Pb07/06 |
| 2.166939728 | -9.205E-06 | -0.07153595 | Pb08/06 |
| 2.382932394 | -1.102E-05 | -0.08458774 | Pb08/07 |
| 0.909362481 | 4.121E-07  | 0.00605279  | Pb07/06 |
| 2.166939728 | -9.205E-06 | -0.07153595 | Pb08/06 |
| 2.382932394 | -1.102E-05 | -0.07471319 | Pb08/07 |
| 0.909362481 | 4.121E-07  | 0.00605279  | Pb07/06 |
| 2.164699207 | 1.153E-06  | 0.01062297  | Pb08/06 |
| 2.381697596 | 5.233E-06  | 0.0416254   | Pb08/07 |
| 0.908895723 | -1.472E-06 | -0.02379114 | Pb07/06 |
| 2.170197199 | -5.123E-08 | -0.00050057 | Pb08/06 |
| 2.385264709 | 7.346E-06  | 0.05725069  | Pb08/07 |
| 0.909847761 | -2.844E-06 | -0.04896055 | Pb07/06 |
| 2.162839602 | -5.974E-06 | -0.04744832 | Pb08/06 |
| 2.385973012 | -1.388E-05 | -0.08319961 | Pb08/07 |
| 0.906488854 | 2.876E-06  | 0.04021684  | Pb07/06 |
| 2.168993519 | 1.628E-06  | -0.07772464 | Pb08/06 |
| 2.383935348 | 2.321E-07  | 0.00929589  | Pb08/07 |
| 0.909837876 | -7.712E-07 | -0.06601293 | Pb07/06 |
| 2.16825105  | -8.199E-08 | -0.00374786 | Pb08/06 |
| 2.383533693 | 3.641E-07  | 0.01531174  | Pb08/07 |
| 0.909679772 | -1.741E-07 | -0.01475405 | Pb07/06 |
| 2.168993519 | -1.628E-06 | -0.07772464 | Pb08/06 |
| 2.383935348 | 2.321E-07  | 0.00929589  | Pb08/07 |
| 0.909837876 | -7.712E-07 | -0.06601293 | Pb07/06 |
| 2.172408931 | 2.361E-06  | 0.01178661  | Pb08/06 |
| 2.389774012 | -6.427E-06 | -0.02596498 | Pb08/07 |
| 0.909058486 | 3.610E-06  | 0.03357508  | Pb07/06 |
| 2.165834315 | -1.565E-05 | -0.09460163 | Pb08/06 |
| 2.385835414 | -8.185E-06 | -0.0431868  | Pb08/07 |
| 0.907800856 | -3.282E-06 | -0.03484093 | Pb07/06 |
| 2.16769104  | -2.254E-05 | -0.1506112  | Pb08/06 |
| 2.38583756  | 2.051E-07  | 0.00118015  | Pb08/07 |
| 0.908578792 | -9.465E-06 | -0.1122476  | Pb07/06 |
| 2.165608472 | 1.170E-05  | -0.08413126 | Pb08/06 |

|             |            |             |         |
|-------------|------------|-------------|---------|
| 2.385817947 | -2.118E-07 | -0.00141916 | Pb08/07 |
| 0.907708446 | -4.763E-06 | -0.0673733  | Pb07/06 |
| 2.173610624 | -1.873E-06 | -0.1086419  | Pb08/06 |
| 2.388081595 | 7.900E-07  | 0.04247705  | Pb08/07 |
| 0.910191461 | -1.085E-06 | -0.12011804 | Pb07/06 |
| 2.172051946 | -4.287E-06 | -0.22731692 | Pb08/06 |
| 2.386012215 | 2.485E-07  | 0.01161857  | Pb08/07 |
| 0.910327894 | -1.893E-06 | -0.19010745 | Pb07/06 |
| 2.160642893 | 9.457E-05  | 0.06858196  | Pb08/06 |
| 2.394338277 | -1.826E-04 | -0.11590466 | Pb08/07 |
| 0.902219702 | 1.252E-04  | 0.16106438  | Pb07/06 |
| 2.156106579 | 1.185E-04  | 0.09100153  | Pb08/06 |
| 2.379067645 | 1.176E-04  | 0.08767613  | Pb08/07 |
| 0.906508355 | 1.306E-05  | 0.01794763  | Pb07/06 |
| 2.155076708 | 1.243E-05  | 0.01028127  | Pb08/06 |
| 2.366753169 | -2.404E-05 | -0.0158989  | Pb08/07 |
| 0.911192952 | 1.945E-05  | 0.02921151  | Pb07/06 |
| 2.166373398 | -4.312E-07 | -0.00775376 | Pb08/06 |
| 2.382784999 | -1.157E-06 | -0.01814712 | Pb08/07 |
| 0.909179413 | 2.677E-07  | 0.00869728  | Pb07/06 |
| 1.74E-08    | -6.889E-11 | -0.8541944  | Pb08/06 |
| 0.128119786 | 1.209E-05  | 0.16928858  | Pb08/07 |
| 1.35E-07    | -5.374E-10 | -0.85254612 | Pb07/06 |
| 5.16E-08    | -4.510E-10 | -0.97383924 | Pb08/06 |
| 0.17411123  | 8.282E-06  | 0.08139895  | Pb08/07 |
| 2.97E-07    | -2.596E-09 | -0.97283575 | Pb07/06 |
| 4.13E-08    | -2.233E-10 | -0.93100026 | Pb08/06 |
| 0.182229359 | 1.846E-05  | 0.16867783  | Pb08/07 |
| 2.27E-07    | -1.233E-09 | -0.92900504 | Pb07/06 |
| 5.75E-09    | -3.252E-11 | -0.70313208 | Pb08/06 |
| 0.042190154 | -2.600E-06 | -0.08965452 | Pb08/07 |
| 1.36E-07    | -7.693E-10 | -0.70282728 | Pb07/06 |
| 2.26E-08    | -5.513E-11 | -0.96031179 | Pb08/06 |
| 0.196455798 | 8.329E-06  | 0.19264483  | Pb08/07 |
| 1.15E-07    | -2.822E-10 | -0.95249935 | Pb07/06 |
| 2.15E-09    | -4.852E-12 | -0.75896711 | Pb08/06 |
| 0.038952749 | -4.477E-07 | -0.03480185 | Pb08/07 |
| 5.53E-08    | -1.244E-10 | -0.76982525 | Pb07/06 |
| 3.69E-08    | -1.509E-10 | -0.94789973 | Pb08/06 |
| 0.200240162 | 2.061E-05  | 0.23543979  | Pb08/07 |
| 1.84E-07    | -7.620E-10 | -0.93556004 | Pb07/06 |
