# Supplementary figures and images for: Studies of SRM NIST glasses by laser ablation multicollector inductively coupled plasma source mass spectrometry (LA-ICP-MS)
Source: Royal Society of Chemistry journal article supplement (doi:10.1039/c2ja10295a), 2012-01-01

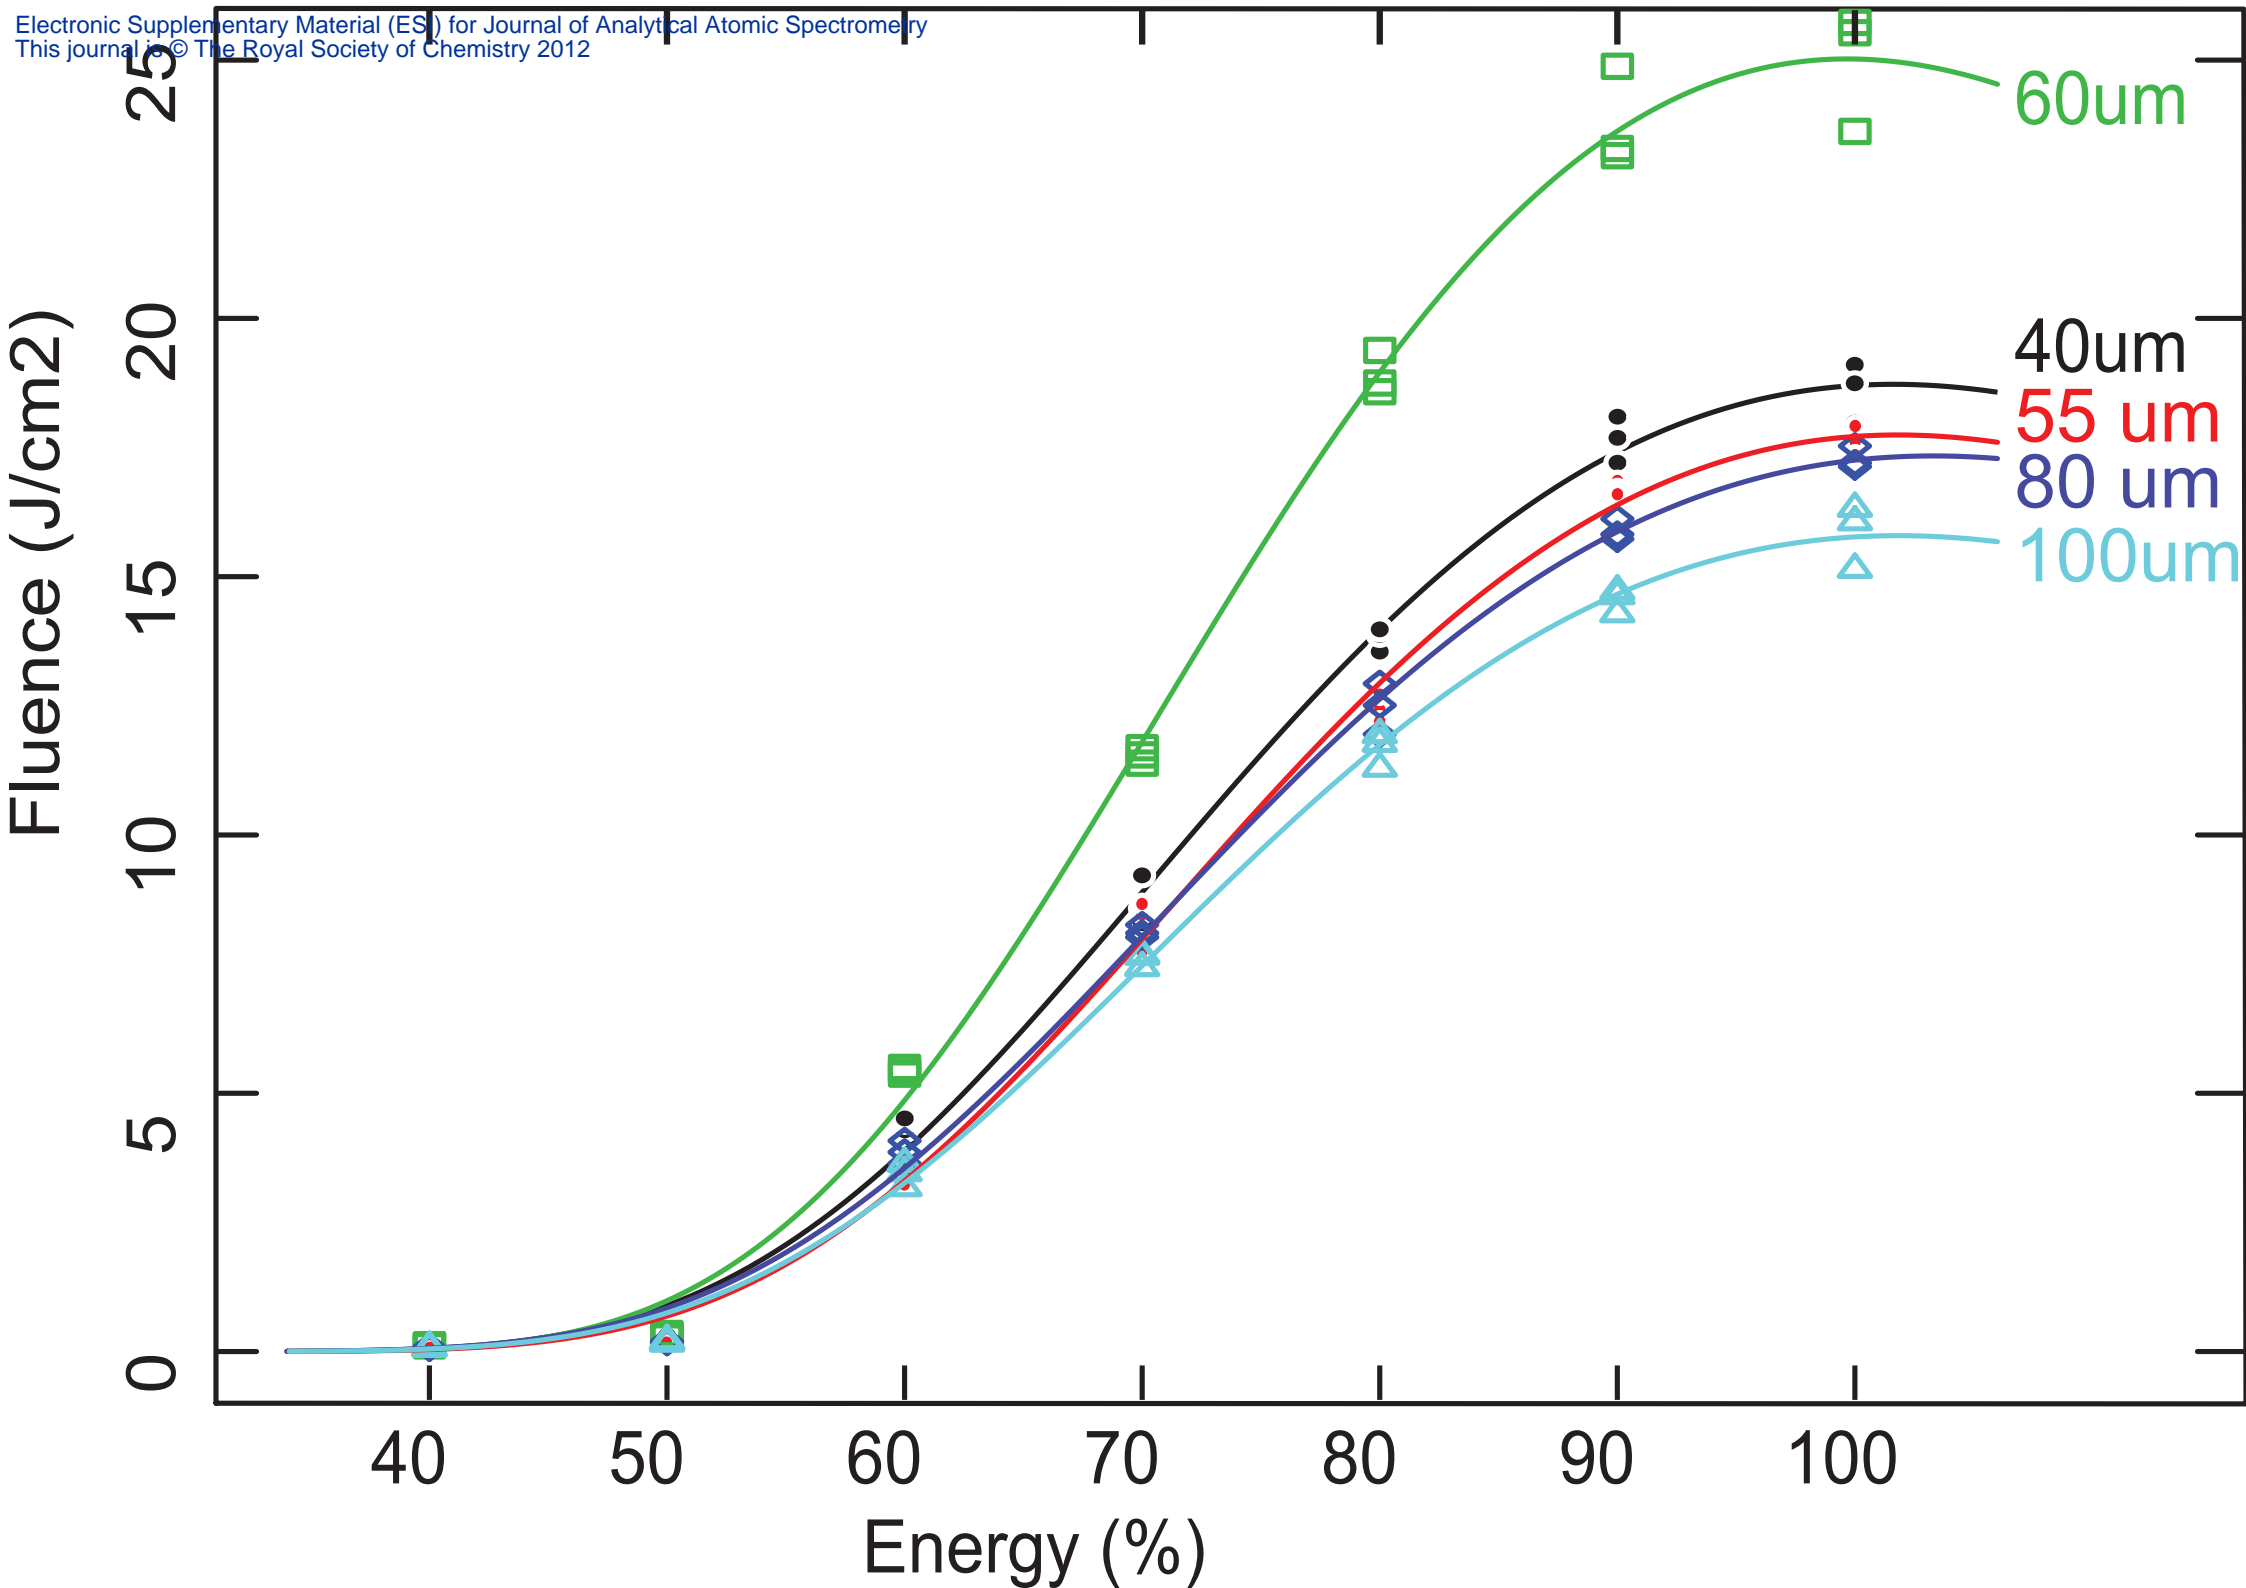

Supplement: c2ja10295a_2.pdf [file c2ja10295a_2.pdf]
